1

2

3 **Multi-level analysis of reproduction in the Antarctic midge, *Belgica antarctica*, identifies female and**  
4 **male accessory gland products that are altered by larval stress and impact progeny viability**

5

6

7 Geoffrey Finch<sup>1</sup>, Sonya Nandyal<sup>1</sup>, Carlie Perrieta<sup>1</sup>, Benjamin Davies<sup>1</sup>, Andrew J. Rosendale<sup>1,2</sup>, Christopher  
8 J. Holmes<sup>1</sup>, Josiah D. Gantz<sup>3,4</sup>, Drew Spacht<sup>5</sup>, Samuel T. Bailey<sup>1</sup>, Xiaoting Chen<sup>6</sup>, Kennan Oyen<sup>1</sup>, Elise M.  
9 Didion<sup>1</sup>, Souvik Chakraborty<sup>1</sup>, Richard E. Lee, Jr.<sup>2</sup>, David L. Denlinger<sup>4,5</sup> Stephen F. Matter<sup>1</sup>, Geoffrey M.  
10 Attardo<sup>7</sup>, Matthew T. Weirauch<sup>6,8,9</sup>, and Joshua B. Benoit<sup>1,\*</sup>

11

12 <sup>1</sup>Department of Biological Sciences, University of Cincinnati, Cincinnati, OH

13 <sup>2</sup>Department of Biology, Mount St. Joseph University, Cincinnati, OH, USA

14 <sup>3</sup>Department of Biology, Miami University, Oxford, OH

15 <sup>4</sup>Department of Biology and Health Science, Hendrix College, Conway, AR

16 <sup>5</sup>Departments of Entomology and Evolution, Ecology and Organismal Biology, The Ohio State University,  
17 Columbus, OH

18 <sup>6</sup>Center for Autoimmune Genomics and Etiology, Cincinnati Children's Hospital Medical Center,  
19 Cincinnati, OH 45229, USA;

20 <sup>7</sup>Department of Entomology and Nematology, University of California, Davis, Davis, CA 95616, USA;

21 <sup>8</sup>Divisions of Biomedical Informatics and Developmental Biology, Cincinnati Children's Hospital Medical  
22 Center, Cincinnati, OH 45229, USA.

23 <sup>9</sup>Department of Pediatrics, University of Cincinnati College of Medicine, Cincinnati, OH 45267, USA.

24 \*Author for correspondence

25 Joshua B. Benoit

26 Department of Biological Sciences,

27 University of Cincinnati, Cincinnati, OH

28 Email: [joshua.benoit@uc.edu](mailto:joshua.benoit@uc.edu)

29 Phone: 513-556-9714

30

31

32

33

34

35

36

37

38

39

40

41 **Abstract**

42 The Antarctic midge, *Belgica antarctica*, is a wingless, non-biting midge endemic to Antarctica. Larval  
43 development requires at least two years, but adult life lasts only two weeks. The nonfeeding adults  
44 mate in swarms and females die shortly after oviposition. Eggs are suspended in a gel of unknown  
45 composition that is expressed from the female accessory gland. This project characterizes molecular  
46 mechanisms underlying reproduction in this midge by examining differential gene expression in whole  
47 males, females, and larvae, as well as in male and female accessory glands. Functional studies were used  
48 to assess the role of the gel encasing the eggs, as well as the impact of stress on reproductive biology.  
49 RNA-seq analyses revealed sex- and development-specific gene sets along with those associated with  
50 the accessory glands. Proteomic analyses were used to define the composition of the egg-containing gel,  
51 which is generated during multiple developmental stages and derived from both the accessory gland  
52 and other female organs. Functional studies indicate the gel provides a larval food source and thermal  
53 and dehydration buffer, all of which are critical for viability. Larval dehydration stress directly reduces  
54 production of storage proteins and key accessory gland components, a feature that impacts adult  
55 reproductive success. Modeling reveals that bouts of dehydration may significantly impact population  
56 growth. This work lays a foundation for further examination of reproduction in midges and provides new  
57 information related to general reproduction in dipterans. A key aspect is that reproduction and stress  
58 dynamics, currently understudied in polar organisms, are likely to prove critical for determining how  
59 climate change will alter survivability.

60 **Keywords:** Antarctic midge, reproduction, stress biology, accessory glands, thermal buffering

61

62

## 63 1 INTRODUCTION

64 The Antarctic midge, *Belgica antarctica*, is long-lived, wingless, and the only insect endemic to maritime  
65 Antarctica (Convey & Block, 1996; Sugg, Edwards, & Baust, 1983). It has a patchy distribution along the  
66 western coast of the Antarctic Peninsula and South Shetland Islands, where it may form large  
67 aggregations into the thousands under favorable conditions (Convey & Block, 1996; SUGG et al., 1983).  
68 The larval period lasts two years; growth and development take place during the short austral summer,  
69 and larvae overwinter encased in ice (Usher & Edwards, 1984). Larvae commonly reside in damp areas  
70 and are non-selective feeders by consuming dead plant and animal matter, algae, and microorganisms  
71 (Edwards, & Baust, 1981; Strong, 1967). Larvae are extremely tolerant of numerous stresses including  
72 cold, dehydration, and UV exposure (JBenoit, Lopez-Martinez, Elnitsky, Lee, & Denlinger, 2009; Benoit,  
73 Lopez-Martinez, Michaud, et al., 2007; Lopez-Martinez et al., 2009; Lopez-Martinez, Elnitsky, Benoit,  
74 Lee, & Denlinger, 2008; Teets et al., 2008). Adult emergence is a fairly synchronous event occurring in  
75 early summer (Edwards, & Baust, 1981), and there is some evidence for protandry (Edwards, & Baust,  
76 1981; Harada, Lee, Denlinger, & Goto, 2014). The wingless adults mate in swarms formed on rocks and  
77 other features of the substrate (Edwards, & Baust, 1981; Harada et al., 2014). Environmental stressors in  
78 Antarctica can be severe and highly variable over short distances and time periods (Convey, 1997;  
79 Kennedy, 1993), and swarming may play a role in locating and taking advantage of intermittent,  
80 favorable microhabitats (Convey & Block, 1996; Hahn & Reinhardt, 2006; Sugg et al., 1983). Mating  
81 swarms present a potential obstacle for establishing long-lasting colonies in a laboratory setting, as  
82 mating is likely facilitated by large-scale, synchronous adult emergence (Harada et al., 2014).

83         Adult females that emerge in the laboratory lay, with a few exceptions, a single egg mass, each  
84 containing about 40 eggs (Convey & Block, 1996; Edwards, & Baust, 1981; Harada et al., 2014; Sugg et  
85 al., 1983). Nevertheless, multiple matings are common, and multiple oviposition events have been

86 reported (Edwards, & Baust, 1981; Harada et al., 2014; Sugg et al., 1983). Specific underlying materials  
87 transferred from the male to the female during copulation are unknown in *B. antarctica*. Eggs are  
88 encased in a hygroscopic gel that has been suggested as a potential food source for developing larvae  
89 (Edwards, & Baust, 1981; Harada et al., 2014). This gel is likely secreted by the female accessory gland  
90 during oviposition, but the protein components of the gel are unknown. Little additional information is  
91 available on reproduction in these extremophiles (Edwards, & Baust, 1981; Harada et al., 2014), and  
92 chironomid reproduction in general is poorly studied beyond the basic descriptions of their reproductive  
93 anatomy and impaired reproduction during exposure to toxic substances (Sibley, Ankley, & Benoit, 2001;  
94 Vogt et al., 2007; Wensler & Rempel, 1962).

95           By contrast, reproduction in other dipteran species has been examined extensively (Alfonso-  
96 Parra et al., 2016; Avila, Sirot, LaFlamme, Rubinstein, & Wolfner, 2011; J.B. Benoit, Attardo, Baumann,  
97 Michalkova, & Aksoy, 2015 ; A. G. Clark et al., 2007; Dottorini et al., 2007; Izquierdo et al., 2019; K. P. Lee  
98 et al., 2008; McGraw, Clark, & Wolfner, 2008; Meier, Kotrba, & Ferrar, 1999; Papa et al., 2017; Polak et  
99 al., 2017; Ravi Ram & Wolfner, 2007; Villarreal et al., 2018). In most Diptera, insemination does not  
100 involve injection of a spermatophore; rather, male seminal fluid is usually transferred directly into the  
101 female reproductive tract, often with the addition of a mating plug to reduce male-male competition as  
102 is seen in mosquitoes and *Drosophila* (Giglioli & Mason, 1966; Lung & Wolfner, 2001; Mitchell et al.,  
103 2015; Scolari et al., 2016). Some flies do utilize a spermatophore, which may facilitate quicker mating  
104 while also creating a barrier to multiple inseminations (Kotrba, 1996). In the tsetse fly, *Glossina*  
105 *morsitans*, a dipteran that uses a spermatophore, proteins making up the spermatophore are secreted  
106 from the male accessory gland during copulation (Attardo et al., 2019; Scolari et al., 2016). The  
107 spermatophore is deposited such that the spermatozoa are funneled efficiently to the openings of the  
108 spermathecal ducts, allowing only one spermatophore to maintain this connection at a time (Attardo et

109 al., 2019; Scolari et al., 2016). In mosquitoes, accessory gland-specific proteins, along with the steroid  
110 hormone, 20-hydroxy-ecdysone, are transferred to the female during copulation, producing a mating  
111 plug (Dottorini et al., 2007; Mitchell et al., 2015; Rogers et al., 2008). In *An. gambiae* the mating plug  
112 has multiple effects that promote copulation, enhance egg production, and even trigger egg laying  
113 (Dottorini et al., 2007; Gabrieli et al., 2014; Mitchell et al., 2015; Thailayil, Magnusson, Godfray, Crisanti,  
114 & Catteruccia, 2011). First-male precedence and last-male precedence have both been reported in  
115 multiple species within the Diptera (Dixon, Coyne, & Noor, 2003; Gwynne, 2012; Price, 1997; Shutt,  
116 Stables, Aboagye-Antwi, Moran, & Tripet, 2010), but it remains unknown how fertilization priority is  
117 established in *B. antarctica*. Depending on the mating strategy of the species, contents of the  
118 spermatophore may include a large amount of seminal fluid proteins (SFPs) and other factors or contain  
119 primarily the sperm itself (Avila et al., 2011; Lung & Wolfner, 2001; Rogers et al., 2008; Scolari et al.,  
120 2016). These seminal fluid proteins are suspected or demonstrated to have a variety of functions,  
121 including induction of refractoriness in the female, counteracting protease activity of female secretions  
122 with protease inhibitors, defending spermatozoa against microbial assault, and neutralizing reactive  
123 oxidative species (Alfonso-Parra et al., 2016; Avila et al., 2011; Lung & Wolfner, 2001; Ravi Ram &  
124 Wolfner, 2007; Shutt et al., 2010), all which can compromise sperm function and impair their ability to  
125 fertilize. The particular cocktail and amounts of SFPs utilized reflects the selection pressure from life-  
126 history differences, conspecific competition, and diverse reproductive strategies between species and  
127 even within species (Hopkins et al., 2019; Hopkins, Sepil, & Wigby, 2017; Izquierdo et al., 2019; Papa et  
128 al., 2017).

129           Secretions from the female accessory glands also play important roles in insemination and  
130 oviposition in dipterans, as well as other insects. In the house fly, *Musca domestica*, female accessory  
131 gland secretions enhance sperm viability (Degrugillier, 1985; Leopold & Degrugillier, 1973). In some

132 species, substances secreted from the female accessory gland are expelled with the eggs at oviposition  
133 and often function as an adhesive, anchoring eggs to the substrate (Lococo & Huebner, 1980). Accessory  
134 gland secretions may also provide protection from diverse biotic and abiotic stressors. In the medfly,  
135 *Ceratitis capitata*, the primary components of the accessory gland secretion deposited during  
136 oviposition are ceratotoxins, which act as potent antibacterial agents (Marchini, Bernini, Marri,  
137 Giordano, & Dallai, 1991). Similarly, accessory gland secretions from the sand fly, *Phlebotomus papatasi*,  
138 have antimicrobial effects that protect the eggs, developing embryos, and adult female reproductive  
139 tract from microbial invasion (Rosetto et al., 2003). Some male seminal fluids also contain antimicrobial  
140 peptides, probably for similar reasons as in the female (Lung, Kuo, & Wolfner, 2001; Poiani, 2006).  
141 Female accessory gland proteins can also be a source of nutrition for developing progeny, either while  
142 growth occurs in the mother or as a secreted food source to nourish external progeny (Benoit, Kölliker,  
143 & Attardo, 2019; Benoit et al., 2015 ; Kaiwa et al., 2014; Kaulenas, 2012).

144 In this study, we use RNA-seq, proteomics, and functional analyses to examine the reproductive  
145 physiology of *B. antarctica*. Specifically, male and female accessory glands are examined to identify  
146 factors related to male accessory protein generation and synthesis of egg components during  
147 oviposition. Proteomic analysis of the gel secretion is used to identify its components, while  
148 comparative genomic analyses are used to identify orthologs of specific reproduction-associated genes  
149 in mosquitoes and midges. Functional studies reveal that stress impinging on late instar larvae impacts  
150 synthesis of gene products associated with reproduction, lowering both male and female reproductive  
151 success. Furthermore, we determine that the gel likely acts to prevent egg dehydration and serves as  
152 thermal buffer, preventing overheating of the eggs. Population growth modeling reveals that impaired  
153 fecundity from larval stress may reduce reproduction below population replacement levels. Our analysis  
154 shows that reproduction in the Antarctic midge is directly impacted by larval stress, and identifies novel

155 roles for products manufactured by the female accessory gland. These studies confirm that an  
156 understanding of reproductive biology is critical for establishing how these Antarctic extremophiles are  
157 able to survive and proliferate in the challenging polar environment.

158

## 159 **2 MATERIALS AND METHODS**

### 160 2.1 Midge collections

161 Antarctic midges were collected from islands near Palmer Station (64°46'S, 64°04'W) in January 2007  
162 and January 2017. Males and females were separated based upon the major morphological characters  
163 described previously (Convey & Block, 1996; Sugg et al., 1983; Usher & Edwards, 1984), homogenized  
164 on-site, and stored in Trizol (Invitrogen) at -70 °C for shipment to the University of Cincinnati. Female  
165 and male accessory glands were also dissected (N = 20-30) and stored in Trizol similar to whole body  
166 stages.

167 Larvae were collected from the same location as adults. Larvae within organic debris were  
168 returned to Palmer Station, and larvae were extracted into ice water with a modified Berlese funnel.  
169 Following recovery, larvae were stored with substrate from their natural habitat (rocks, soils, moss, and  
170 the alga *Prasiola crispa*, which serves as a food source for *B. antarctica*) at 2-4 °C. Larvae were shipped  
171 to the University of Cincinnati and stored under similar conditions until they were used in studies  
172 examining the impact of larval stress or gel presence on adult fertility or egg viability, respectively.

173

174



175 2.2 RNA extraction and processing

176 RNA was extracted from the midges by homogenization (BeadBlaster 24, Benchmark Scientific) in Trizol  
177 reagent (Invitrogen), using manufacturer's protocols with slight modification based on other studies of  
178 invertebrates (Hagan et al., 2018; Rosendale, Dunlevy, McCue, & Benoit, 2019). Extracted RNA was  
179 treated with DNase I (Thermo Scientific) and cleaned with a GeneJet RNA Cleanup and Concentration  
180 Micro Kit (Thermo Scientific) according to manufacturer's protocols. RNA concentration and quality  
181 were examined with a NanoDrop 2000 (Thermo Scientific).

182 Poly(A) libraries were prepared by the DNA Sequencing and Genotyping Core at the Cincinnati  
183 Children's Hospital Medical Center. RNA was quantified using a Qubit 3.0 Fluorometer (Life  
184 Technologies). Total RNA (150-300 ng) was poly(A) selected and reverse transcribed using a TruSeq  
185 Stranded mRNA Library Preparation Kit (Illumina). An 8-base molecular barcode was added to allow for  
186 multiplexing and, following 15 cycles of PCR amplification, each library was sequenced on a HiSeq 2500  
187 sequencing system (Illumina) in Rapid Mode. For each sample, 30-40 million paired-end reads at 75  
188 bases in length were generated. Raw RNA-seq data have been deposited at the National Center for  
189 Biotechnology Information (NCBI) Sequence Read Archive: Bio-project PRJNA576639. Along with the  
190 RNA-seq samples collected for this study, larval (control, dehydration, and cryoprotective dehydration)  
191 samples were acquired from Teets et al. (Teets et al., 2012) under the NCBI Bioproject PRJNA174315.

192

193 RNA-seq reads were trimmed for quality (Phred score limit of 0.05) and sequences with  
194 ambiguities were removed. In addition, five and eight nucleotides were removed from the 5' and 3'  
195 ends, respectively, and sequences shorter than 45 bases were removed. Reads before and after cleaning

196 and trimming were examined with FastQC for quality (S. Andrews  
197 <http://www.bioinformatics.babraham.ac.uk/projects/fastqc>) to verify the quality of each set.

198

199

## 200 2.3 Gene expression analyses

201 RNA-seq analyses were conducted using two distinct pipelines. The first method utilized was CLC  
202 Genomics (Qiagen), as previously described (Hagan et al., 2018; Rosendale et al., 2019). Briefly, reads  
203 were mapped to contigs with a cutoff of at least 80% of the read matching at 90% identity with a  
204 mismatch cost of 2. Each read was permitted to align to only 20 contigs. Expression values were based  
205 on total read counts in each sample calculated as transcripts per million reads mapped. EdgeR was used  
206 to test significance among samples. A multiple comparison correction was performed (false discovery  
207 rate, FDR). Genes were considered to be differentially expressed if the fold change was greater than 2.0  
208 and the p-value was  $< 0.05$ . In addition, genes were required to have at least 5 mapped reads per  
209 sample to be retained for further analyses. For whole-carcass expression analyses, genes were  
210 considered sample-specific if enrichment was noted in relation to both of the other whole-carcass  
211 datasets. For accessory gland specific analyses, genes were considered tissue specific if they were  
212 enriched relative to the relevant whole-carcass dataset (female or male). In addition, a *de novo*  
213 assembly was conducted on the female accessory gland RNA-seq datasets using Trinity (Grabherr et al.,  
214 2011) based on standard methods to determine if bacterial symbionts were present in this organ and  
215 could be transferred to the egg while in the gel.

216 The second method for examining transcript expression involved utilization of RNA-seq tools  
217 available through the Galaxy software package ([www.https://usegalaxy.org/](https://usegalaxy.org/)) (Afgan et al., 2018;

218 Goecks, Nekrutenko, & Taylor, 2010) using Salmon with the suggested settings. Differential expression  
219 between genes was examined with the DeSeq2 package (Love, Huber, & Anders, 2014). A general  
220 linearized model assuming a binomial distribution followed by a false discovery rate (FDR) approach  
221 were utilized to account for multiple testing. Cut-off values for significance, enrichment and sample-  
222 specificity were the same as those used in analysis conducted with CLC Genomics.

223         Transcripts identified as sex- or development-specific were examined using the CLC-based  
224 pipeline as there was over 95% overlap between each RNA-seq analysis method. Pathways enriched  
225 within males, females, and larvae were identified with a combination of Database for Annotation,  
226 Visualization and Integrated Discovery (DAVID (Huang da et al., 2009)), Blast2GO enrichment  
227 analyses (Conesa et al., 2005), CLC gene set enrichment analysis (Clark & Ma'ayan, 2011), and g:Profiler  
228 (Raudvere et al., 2019). Due to the taxonomic limitations of DAVID, sets of enriched transcripts were  
229 compared by BLASTx to the *An. gambiae* and to the *D. melanogaster* RefSeq protein datasets to identify  
230 homologous sequences. Blast hits (e-value < 0.001) from these two species were submitted to DAVID.  
231 There was considerable overlap between the results, and only the CLC-based methods were used in  
232 subsequent analyses.

233         Lastly, we utilized weighted correlation network analysis (WGCNA) to identify specific modules  
234 of genes that have similar expression profiles across developmental stages and accessory glands  
235 (Langfelder & Horvath, 2008). WGCNA was implemented in an R software package used to construct  
236 correlation networks and describe correlation between gene expression across samples in RNA-seq or  
237 microarray data. Genes sharing similar patterns of expression across samples were clustered into  
238 modules to identify groups of biologically significant genes that were particular to one of the sample  
239 groups. For this analysis, RNA-seq data were screened for genes of zero variance prior to WGCNA,  
240 leaving 13,424 genes for signed network construction. The minimum module size allowed was 20 and

241 the soft power was set to 14 as determined by the package's scale-free topology function. Modules  
242 exhibiting the highest Pearson correlation coefficient were selected for further analysis to determine  
243 function and relationship to developmental stages and accessory glands. Modules identified as enriched  
244 in a specific developmental stage or tissue were examined for enriched GO categories with the use of  
245 g:Prolifer and DAVID, as described earlier.

246

#### 247 2.4 Comparative analyses with other chironomid midges and *Anopheles* mosquitoes

248 This is the first study to examine genome-wide, sex- and stage-specific expression in a midge. However,  
249 a recent study examines sex-specific expression in four species of anopheline mosquitoes, a clade not  
250 distantly related to midges, along with expression specific to the male and female reproductive tracts  
251 (MRT and FRT, respectively (Papa et al., 2017)). The species covered in this study were *An. gambiae*, *An.*  
252 *minimus*, *An. albimanus*, and *An. arabiensis*. In addition, male accessory glands enriched genes for *B.*  
253 *antarctica* were directly compared to those from *Anopheles* male accessory glands (Izquierdo et al.,  
254 2019). Predicted gene sets from this study that had enriched expression in specific stages and organs  
255 were used in comparative analyses with *B. antarctica*. The genomes of four species of chironomid  
256 midges were also acquired: *Clunio marinus* (Kaiser et al., 2016), *Parochlus steinenii* (Kim et al., 2017),  
257 *Polypedilum vanderplanki* (Gusev et al., 2014), and *Polypedilum nubifer* (Gusev et al., 2014). Studies that  
258 resulted in these sequenced midge genomes did not include analyses of differential expression between  
259 sexes.

260 For comparative analyses between midges, predicted gene sets for *B. antarctica* were compared  
261 with genomes of each midge species, and results of these four analyses were pooled to establish  
262 putative sets of genes common to all five species. This analysis also resulted in identification of

263 differentially expressed genes unique to *B. antarctica*. Similarly, predicted gene sets from *B. antarctica*  
264 were compared with each species of *Anopheles* mosquito. Antarctic midge gene sets were compared to  
265 *Anopheles* whole carcass gene sets, as well as reproductive tract-specific gene sets (Papa et al., 2017).  
266 Lastly, we compared the expression of genes within the male accessory glands to orthologous gene sets  
267 that are uniformly expressed in the male accessory glands of mosquitoes (Izquierdo et al., 2019). The  
268 common gene sets produced by these analyses were then subjected to ontological analyses, using  
269 gProfiler, to establish sex-specific enriched pathways. tBLASTp analyses (e-value < 0.001) were  
270 performed using CLC Genomics Workbench (CLC bio Qiagen). Protein sequences were defined as  
271 orthologs if they were reciprocal-best BLASTp hits having an e-value <  $10^{-10}$ . Overlap was compared  
272 between these analyses to produce putative sex-specific transcript sets.

273         Transcription factors (TFs) and their predicted DNA binding motifs were identified based on  
274 methods used for other invertebrate genomes (Attardo et al., 2019; Benoit et al., 2016; Olafson et al.,  
275 2019). In brief, putative TFs were identified by scanning the amino acid sequences of all proteins for  
276 putative DNA binding domains using the HMMER software package (Eddy, 2009) and a compilation of  
277 Pfam DNA binding domain models (Weirauch & Hughes, 2011). Experimentally determined DNA binding  
278 motifs were then inferred from other species (*e.g.*, *Drosophila*) based on amino acid identity, using  
279 previously established rules (Weirauch et al., 2014). Using this collection of inferred DNA binding motifs,  
280 we examined enrichment of each motif within the 500 and 2000 bp promoter regions of genes with  
281 increased expression in each sex, larvae, and accessory glands. These results were then compared to the  
282 expression profiles of each TF to determine specific TF candidates that might regulate sex and  
283 reproduction associated genes.

284

## 285 2.5 PCR and qPCR analyses

286 Select genes of interest that were highly enriched within males and females were examined by PCR.  
287 Total RNA was extracted from males, females, larvae, female accessory glands, and male accessory  
288 glands as described previously in the RNA-seq section and used as a template for Superscript III reverse  
289 transcriptase according to the manufacturer's protocols (Invitrogen). PCR was performed with gene-  
290 specific primer pairs (Table S15) using a DNA polymerase kit (Promega). The PCR conditions were 95 °C  
291 for 3 min, 35 cycles of 30 sec at 95 °C, 52-56 °C for 1 min, and 1 min at 70 °C using an Eppendorf  
292 Mastercycler Pro Series. Three independent (biological) replicates were conducted for each sex or  
293 tissue stage.

294 qPCR analyses were conducted based on previously developed methods (Rosendale, Romick-  
295 Rosendale, Watanabe, Dunlevy, & Benoit, 2016). RNA was extracted as described previously for  
296 independent biological replicates. Complementary DNA (cDNA) was generated with a DyNAmo cDNA  
297 Synthesis Kit (Thermo Scientific). Each reaction used 250 ng RNA, 50 ng oligo (dT) primers, reaction  
298 buffer containing dNTPs and 5 mmol•l<sup>-1</sup> MgCl<sub>2</sub>, and M-MuLV RNase H<sup>+</sup> reverse transcriptase. KiCqStart  
299 SYBR Green qPCR ReadyMix (Sigma Aldrich, St Louis, MO, USA) along with 300 nmol l<sup>-1</sup> forward and  
300 reverse primers, cDNA diluted 1:20, and nuclease-free water were used for all reactions. Primers were  
301 designed using Primer3 based on contigs obtained from the transcriptome analysis (Table S15). qPCR  
302 reactions were conducted using an Illumina Eco quantitative PCR system. Reactions were run according  
303 to previous studies (A. J. Rosendale et al., 2016). Four biological replicates were examined for each sex,  
304 and three biological replicates were examined for each accessory gland. Expression levels were  
305 normalized to *rp19* using the  $\Delta\Delta Cq$  method as previously described (Joshua B Benoit et al., 2018; A. J.  
306 Rosendale et al., 2016). Fold change was compared between larvae, males, females, and accessory  
307 glands followed by a Pearson correlation coefficient (*r*).

308

309 2.6 Proteomics analysis of accessory gland-derived gel

310 Samples were analyzed at the Proteomics and Metabolomics Laboratory at the University of Cincinnati.

311 Two proteomic samples were collected by removing eggs from the gel with a micropipette and

312 dissolving the gel in 1X PBS with 0.1% Tween. Samples (4 µg) were run on a 1D SDS PAGE gel and silver

313 stained to confirm the presence of proteins; at least 15 distinct proteins could be visualized. Based on

314 this initial characterization, gel proteins (6 µg) were run 2 cm into a 1D 4-12% Bis-Tris Invitrogen NuPage

315 gel using MOPS buffer. Lanes were excised, reduced with 10 mM dithiothreitol, alkylated with

316 Iodoacetamide and digested with trypsin according to the standard protocol (Heaven et al., 2016;

317 Turnier et al., 2018). The resulting peptides were concentrated with a speed vac centrifuge and

318 resuspended in 0.1% formic acid. Each sample (2 µg) was used in subsequent analyses. Nanoscale LC-

319 electrospray ionization-MS/MS (nanoLC-ESI-MS/MS) analyses were performed on a TripleTOF 5600

320 (Sciex, Toronto, ON, Canada) coupled to an Eksigent (Dublin, CA) nanoLC ultra nanoflow system. Protein

321 from each gel sample was loaded and analyzed as described (Heaven et al., 2016; Turnier et al., 2018).

322 The data were recorded using Analyst-TF (v.1.6) software and searched against the *B. antarctica* genome

323 (Kelley et al., 2014) using the Protein Pilot program (Sciex). Gel proteins were compared to those with

324 differential expression in specific tissues from our RNA-seq studies. Protein, carbohydrate, and lipid

325 content were examined through spectrophotometric assays based upon methods described in

326 Rosendale et al. (2019)

327

328

329

## 330 2.7 Thermal buffering by the accessory gland gel

331 The gel has been suggested to serve as a source of nutrients for newly emerged larvae (Convey, 1992;  
332 Convey & Block, 1996; Harada et al., 2014). In addition to this role, we examined whether the gel  
333 increases thermal buffering capabilities of the egg compared to eggs directly deposited on the local  
334 substrate. To examine the effect, we placed an Omega thermocouple within six gels and immediately  
335 adjacent to these six gels at a field location near Palmer Station. Temperature was measured every  
336 minute over the course of three days.

337 To establish whether the gel prevents egg death caused by thermal stress, eggs with and  
338 without gels were exposed to 20 °C for two hours. Females were allowed to lay their eggs onto filter  
339 paper disks (Whatman) which were placed in 50 ml centrifuge tubes before being transferred to a 4 °C  
340 water bath. Temperature was then ramped up to 20 °C over the course of four hours 4 °C per hour  
341 before slowly being reduced back to 4 °C over the same course of time. These samples were compared  
342 to those that were held statically at 4 °C without the gel. Following treatment, all eggs were maintained  
343 at 4 °C and monitored for larval emergence.

344

## 345 2.8 Role of the accessory gland gel in dehydration

346 To determine if the accessory gland gel could prevent egg dehydration, we subjected midge eggs to  
347 dehydrating conditions with and without the gel's presence. All eggs were removed from the gel with a  
348 fine metal probe and half were carefully reinserted into the gel. Three groups of eggs with or without  
349 the gel were moved to 75% RH at 4 °C for 12 hours. Following this treatment, eggs with no gel were  
350 placed back into the gel. Viability was determined by counting the number of larvae that emerged from  
351 the total number of eggs.



352

### 353 2.9 Impact of larval dehydration stress on fecundity

354 To determine if larval dehydration stress impacts adult fecundity, we performed combined RNA-seq  
355 analysis (described previously) and exposure of larvae to dehydration stress, both standard and  
356 cryoprotective (Teets et al., 2012). RNA-seq studies were conducted on larvae that were quickly  
357 dehydrated (30% water loss) and on those that had undergone a slower form of dehydration,  
358 cryoprotective dehydration (30% water loss). The resulting data sets were then examined to find genes  
359 with increased expression in male or female accessory glands.

360 To determine whether mating is directly impacted by dehydration stress, groups of 100 fourth  
361 instar larvae (final larval instar) were held at 75% RH until they lost 40% of their water content.  
362 Following dehydration, larvae were returned to the standard rearing conditions and monitored every 12  
363 hours for the presence of pupae or newly emerged adults. Each adult was removed and stored  
364 separately at 98% RH, 4°C until mating, which occurred no later than four days after treatment. The  
365 following mating pairs were examined: males from dehydrated larvae vs. control females, females from  
366 dehydrated larvae vs. control males, and both males and females from dehydrated larvae. Males and  
367 females that failed to copulate were removed from the experiment.

368

### 369 2.10 Statistics

370 Replicates are independent biological samples. Sample sizes are listed in each method section or the  
371 figure legend. Significance is indicated within each figure and/or in the figure legend. Statistical tests are

372 listed within the respective section in the methods or in the figure legends. All statistical analyses were  
373 performed using JMP version 11 (SAS) or R-based packages.

374

## 375 2.11 Population level effects

376 To explore population level effects of dehydration, gel surrounding the egg mass, and thermal stress we  
377 used a Leslie matrix approach (Lefkovitch, 1965). Here, the dominant eigenvalue of the matrix is the  
378 population growth rate ( $\lambda$ ). We simplified life history to egg to larvae to adult despite there being four  
379 larval instars, potentially occurring over several years. For control populations we used a mean fecundity  
380 of 42.9 (eggs laid), an egg survival rate of 0.82, and larval survival rate of 0.78. To determine the effects  
381 of larval dehydration on population growth, we used fecundities (eggs laid) of 34.6, 35.6, and 21.5 for  
382 male, female, and male and female dehydration, respectively; egg and larval survivorship were assumed  
383 to be the same as control populations. To determine the effects of gel on population growth we used all  
384 parameters (as for control populations), but reduced larval survival to 0.5, based on the experimental  
385 data from our studies. Similarly, to investigate effects of thermal stress we reduced egg survivorship to  
386 0.63, but left all other parameters at control values. We also investigated a worst case scenario with  
387 male and female dehydration, no gel, and thermal stress. All values were derived from the previously  
388 described experiments. We determined the dominant eigenvalue of each matrix using the function  
389 “eigen” in R.

390

391

392

### 393 **3 RESULTS**

#### 394 3.1 Description of mating and reproductive organs in *B. antarctica*

395 Beyond copulation and sex ratios (Edwards, & Baust, 1981; Harada et al., 2014; Sugg et al., 1983), little is  
396 known about mating and reproductive aspects for *B. Antarctica*. In this study, the reproductive organs  
397 were observed by dissection. Following copulation (Fig. 1A), a spermatophore containing sperm and  
398 other, likely accessory gland products, are transferred as a bundle to the females (Fig. 1A, inset).  
399 Females deposit a gel around the fertilized eggs, and it is within this gel that embryogenesis occurs (Fig.  
400 1B). The source of the gel appears to be the female's accessory gland (Fig. 3C) because the gland is  
401 depleted followed egg laying (Fig. 1D,E). The male reproductive organs, including the testes and  
402 accessory glands, are depicted in Fig. 1F. The general organization and structure of the male and female  
403 reproductive anatomy is similar to that of another midge, *Chironomus plumosus* (Wensler & Rempel,  
404 1962) and mosquitoes (Masci et al., 2015), with the exception that the female accessory gland of *B.*  
405 *antarctica* is dramatically enlarged. It is this enlarged gland that we consider to be the source of the  
406 gel deposited around the eggs.

407

#### 408 3.2 RNA-seq analyses of *Belgica* reproduction

409 Differential transcript levels were determined for males, females, and larvae using two independent  
410 pipelines using the *B. antarctica* genome as a reference (Kelley et al., 2014). The two pipelines yielded  
411 95% overlap at our significance cut-off (two-fold difference, combined transcripts per million (TPM)  
412 among all samples of at least 5, and a correction-based P-value < 0.05). Between 60% and 71% of the  
413 reads from each RNA-seq set mapped to predicted genes. At the 4-fold or greater level for stage-  
414 specificity, overlap between the two methods was over 99%; thus we used the CLC Genomics (Qiagen)

415 pipeline (Attardo et al., 2019; Rosendale et al., 2019) for the remaining analyses (Table S1). When  
416 expression differences were compared among all developmental stages, each sex and associated  
417 reproductive organs were most similar, followed by similarity between adults, while the larval stages  
418 were the most unique (Fig. 2). When the *de novo* assembly was examined for presence of putative  
419 microbial symbionts, we detected no substantial matches (Table S2), indicating the gel does not likely  
420 serve as a source of potential microbial symbionts as in other insects (Kaiwa et al., 2014).

421 Individual comparisons between stages revealed 392 male-enriched genes, 1825 female-  
422 enriched genes, and 862 genes enriched in larvae (Fig. 2, Table S3-S5). Specific gene ontology (GO)  
423 categories were associated with each stage including carboxylic acid biosynthesis in males, DNA repair in  
424 females, and aminoglycan metabolism in larvae (Fig. 3; Table S3-S5). When accessory glands were  
425 specifically examined, 20 genes were enriched in the female accessory gland and had significantly higher  
426 expression in females compared to other stages (Fig 4A; Table S6). A similar analysis for the male  
427 accessory gland identified 25 enriched genes. GO categories associated with the female accessory gland  
428 were associated with glycosylation and mucin biosynthesis. Notably, similar GO categories were  
429 associated with gene products of the male accessory gland (Fig. 4B; Table S7).

430 Beyond this first analysis, weighted correlation network analysis (WGCNA, Langfelder &  
431 Horvath, 2008) was used to identify clusters (modules) of highly correlated genes between  
432 developmental stages and within specific reproductive organs (Fig. 5; Table S8-S12). Specific modules of  
433 enriched expression were identified in each tissue and developmental stage (Fig. 5B,C). When GO  
434 analyses were conducted for each developmental stage, unique GO categories were associated with  
435 larvae, females, and males (Fig. 5). Female accessory glands had few enriched GO categories based on  
436 WGCNA results; enriched categories included phosphatase binding, response to stimulus, and ion  
437 channel activity. Male accessory glands also had a low number of GO categories associated with

438 enriched modules; these included metallopeptidase activity and integral components of the membrane.  
439 These results provide correlated stage- and tissue-specific expression modules. For larvae, males, and  
440 females, GO categories from stage specific modules showed overlap with our previous analysis (Fig. 3),  
441 but unique categories were also identified (Fig. 5).

442

### 443 3.3 Proteomic analysis of accessory gland derived gel

444 Proteomic analysis of the gel surrounding the eggs revealed 24 associated proteins (Fig. 6). Three  
445 proteins comprised a majority of the gel (Fig. 6B; Table S13), including a vitellogenin-like protein  
446 (IU25\_12621), larval serum protein (IU25\_03947), and an apolipoprotein (IU25\_03809). The two  
447 analyzed gel samples had a highly-correlated protein content (Pearson correlation = 0.92, Fig. 3C).  
448 Expression analyses revealed that transcripts for most of the gel proteins are not directly generated in  
449 the female accessory gland (Fig. 3D), but instead are produced in other female organs (e.g. IU25\_12621)  
450 or within the larvae (e.g. IU25\_03947 and IU25\_03809). qPCR validation of the protein gel components  
451 confirmed that transcripts for each of the gel proteins are expressed in tissues identified in the RNA-seq  
452 studies (Fig. 5E). Additional qPCR analyses for genes not involved in producing major components of the  
453 gel served as validation for results obtained from other RNA-seq samples (Fig. 5E).

454

### 455 3.4 Transcriptional regulation of reproductive-associated factors

456 To compare potential mechanisms regulating gene expression between samples, we predicted putative  
457 transcription factors (TFs, Fig. 7A, Table S14) and their DNA binding motifs. We next performed TF  
458 binding site motif enrichment analysis in the upstream regulatory regions of our differentially expressed

459 gene sets (see Methods). This analysis revealed that fourteen TFs had significantly enriched binding  
460 sites in at least one gene set (Fig. 7B). Of these, one TF showed enhanced binding in the 500bp  
461 regulatory regions of male-enriched genes. The remaining thirteen showed enhanced binding in female-  
462 enriched genes; we limited our analysis to the set of seven TFs with enhanced binding in both 500 and  
463 2000bp regions of the female- and/or FeAG-enriched gene sets. Five members of this set showed higher  
464 transcript levels in either the female or female accessory gland compared to other tissues and  
465 developmental stages (Fig. 7C). The increased gene expression in the respective tissues or stage along  
466 with enriched binding sites suggest that these TFS are key regulatory elements for female reproduction  
467 in *B. antarctica*. Transcription factors include forkhead box protein 1 and mothers against  
468 decapentaplegic (Mad) homolog 1. In *Drosophila* Mad has been identified as a participant in the  
469 signaling pathway of *decapentaplegic* (*dpp*), a morphogenetic protein that plays a role in regulating the  
470 development of egg polarity and early embryonic development (Xie & Spradling, 1998). Several  
471 transcription factors identified in our screening remain uncharacterized with no assigned biological  
472 functions.

473

### 474 3.5 Comparative analyses between anopheline mosquitoes and chironomid midges

475 Sex- and tissue-specific gene sets from *B. antarctica* were compared with predicted gene sets from four  
476 species of *Anopheles* mosquitoes and four species of chironomid midges (Figs. 8 and 9). Additionally, *B.*  
477 *antarctica* enriched gene sets were compared with gene sets enriched in male and female reproductive  
478 tracts of the same four *Anopheles* mosquitoes (Papa et al., 2017) (Fig. 8 and 9) and in comparison to the  
479 male accessory gland enriched genes from five *Anopheles* species (Izquierdo et al., 2019)

480 Genes enriched in females of *B. antarctica* showed the highest degree of conservation among all  
481 species examined by a large margin. All five species of midges had 1396 genes in common, 1401 were  
482 shared with all four *Anopheles* species, and 1267 were common to all 9 species examined (Fig. 8). Gene  
483 ontology analysis of this set revealed enrichment in functions related to RNA, DNA, chromatin binding,  
484 nuclease activity, chromosome and organelle organization, transport of RNA and proteins in and out of  
485 the nucleus, RNA processing, and cell cycle regulation. No female-enriched genes detected in *B.*  
486 *antarctica* were unique when compared to the other eight species examined. *Belgica* females have 122  
487 genes with no orthologues in any of the other four midge species. However, this gene set did not show  
488 significant enrichment in any GO functional categories.

489 Among males, 345 genes were common among midge species, and 337 genes were shared  
490 between *B. antarctica* and all four mosquito species (Fig. 8). Genes common to all midge species were  
491 enriched in functions associated with anion transport, alpha-amino acid catabolism, and carboxylic acid  
492 transmembrane transport. As with females, no genes were identified in the male-enriched gene set that  
493 were unique to *B. antarctica*. There were 16 genes unique to *B. antarctica* among the five midge  
494 species, but, again, they were not significantly enriched in any single functional category.

495 The larva-enriched gene set was compared to the midge and mosquito gene sets. Over 600  
496 genes were identified with orthologues common to all examined midge and mosquito species (Fig. 8).  
497 The gene set common to all midge species was enriched in functional categories associated with chitin  
498 metabolism, iron ion binding, and cytochrome P450-driven metabolism. Two identified genes were  
499 unique to larvae of *B. antarctica* (Fig. 8; Table S5): one is uncharacterized, and the other putatively  
500 encodes polyubiquitin B. Gene ontology analysis comparing larvae of *Belgica* with other midges revealed  
501 88 unique genes, but no functional categories were significantly enriched for this gene set.

502 Gene sets specifically enriched in male and female reproductive tracts of each mosquito species  
503 were compared to sex-specific gene sets in *B. antarctica* (Fig. 9; Table S6-7). Comparison of the female-  
504 enriched gene set with the female reproductive tract (FRT)-specific gene set yielded 241 genes with  
505 putative FRT orthologues. This set was particularly enriched in GO categories related to mitotic cell cycle  
506 processes and regulation of gene expression. For example, several orthologues in this set code for  
507 cyclins, cyclin dependent kinases, zinc-finger proteins, transcription factors, and transcription  
508 termination factors. Additionally, a large number of genes in this set (~44%) mapped to apparently  
509 uncharacterized orthologs. The comparison between male-enriched and Male Reproductive Tract (MRT)  
510 specific genes yielded a common set of 48 genes. This set is dominated by CLIP-domain serine proteases  
511 and cytochrome p450s, and also contains three glucose-dehydrogenases (Fig. 9). When *B. antarctica*  
512 MAG-enriched genes are compared to those for mosquitoes, only four overlapping genes were  
513 identified based on moderate or high expression reported in a previous study (Izquierdo et al., 2019) of  
514 the mosquito MAG (Fig. 9C); these were identified as venom allergen, carboxypeptidase, serine  
515 protease, and a gene of unknown function.

516

### 517 3.6 Dehydration reduces larval serum protein and possibly subsequent egg production

518 Since specific female accessory gland components are expressed in larvae, we asked whether larval  
519 dehydration impacts expression of adult female accessory gland components (Fig. 10). To do so, we re-  
520 analyzed results from a previous RNA-seq study (Teets et al., 2012) on dehydration and cryoprotective  
521 dehydration of *B. antarctica* (Fig. 10). One of the major female accessory gland proteins (IU25\_03947)  
522 had significantly reduced expression when larvae experienced either dehydration or cryoprotective  
523 dehydration (water loss specifically induced by cold temperatures) (Fig. 10A-B). This protein is a



524 component of the accessory gel and, as a hexamerin, serves as a protein reserve (Burmester, 1999;  
525 Burmester, Massey Jr, Zakharkin, & Benes, 1998; Telfer & Kunkel, 1991). The dehydration-evoked  
526 suppression in transcripts associated with reproductive-associated factors possibly results in reduced  
527 amounts of materials invested in the progeny at birth and reduced egg output (Fig. 10D-F). These results  
528 suggest that stress experienced as larvae may have a direct impact on female reproduction, most likely  
529 acting through reduced expression of larval serum protein.

530

### 531 3.7 Dehydration reduces specific male accessory gland components and impacts fertilization

532 We next examined the impact of larval dehydration stress on male fertility. To do so, we analyzed  
533 expression of accessory gland components in adult males after larval dehydration or cryoprotective  
534 dehydration (Fig. 11A). Thirteen genes enriched in male accessory glands were differentially expressed  
535 in the adult male following larval dehydration compared to fully-hydrated individuals (Fig. 11A).  
536 Enrichment of glutathione transferase activity and phosphatidylcholine metabolic processes were  
537 detected. Male body mass was not altered following dehydration stress, but mating was substantially  
538 compromised (Fig. 11B-C). When males dehydrated as larvae mated with unstressed females, fewer  
539 eggs were deposited, and additive reductions were noted if dehydrated males mated with females that  
540 were dehydrated as larvae (Fig. 11C). These results indicate an impact on male fertility brought about  
541 by dehydration stress during larval life.

542

543

544

### 545 3.8 Role of gel as a nutrient source

546 Analyses of major gel protein components (over 3% of the total proteins of the gel) was performed.  
547 Amino acid content of the major protein components revealed that all essential amino acids can be  
548 provided within the gel (Fig. 12A). Predicted glycosylation and phosphorylation sites of the proteins  
549 suggest that these proteins could provide phosphate and sugar resources for the developing larva as the  
550 gel is consumed (Fig. 12). Spectrophotometric analysis of the gel revealed that 81%, 14%, and 5% of the  
551 caloric content consisted of proteins, carbohydrates, and lipids, respectively. Larvae were denied access  
552 to the gel to determine its impact on larval growth (Fig. 12B). Fewer of the gel-less larvae were alive  
553 after one month (Fig. 12B), and those remaining were nearly 30% smaller than larvae that hatched from  
554 eggs with free access to the gel (Fig. 12C). Importantly, these larvae were provided access to algae and  
555 other organic debris with and without gel, indicating that non-gel food resources do not fully  
556 compensate for loss of the gel as a food source. These results underscore the value of the gel for  
557 successful larval development.

558

### 559 3.9 Thermal and dehydration buffering by the gel

560 We performed experiments to determine whether the gel impacts dehydration resistance in developing  
561 eggs. When gel-less eggs were held in desiccating conditions (75% relative humidity) at 4 °C for 12 h and  
562 subsequently treated with water, no viable eggs were detected, even when the eggs were  
563 subsequently covered with gel to promote growth (0% for all three replicates). By contrast, viability of  
564 eggs encased in gel exceeded 80% under in the same conditions, suggesting that the accessory gel  
565 protects eggs against dehydration-induced mortality. These results indicate that the gel is likely critical  
566 for maintaining water homeostasis within the egg and possibly for the developing embryo as well.

567 We also examined whether the gel acts as a thermal buffer. First, temperature changes were  
568 examined within the gel (next to the eggs) and on the surface immediately adjacent to the eggs (Fig.  
569 13A). The gel buffered temperature changes during the course of the day by reducing both the  
570 maximum temperature and the rate of temperature change (Fig. 13). Gel-less eggs exposed to 20 °C  
571 displayed reduced viability when compared to eggs encased in gel and to those held constantly at 4 °C  
572 (Fig. 13). These results indicate that the accessory gland gel provides both thermal and dehydration  
573 protection to the eggs.

574

### 575 3.10 Population modeling

576 Dehydration of males, females, and both males and females together reduced population growth  
577 relative to control populations (Fig. 14). The combined effect of male and female dehydration had the  
578 largest effect, reducing population growth by nearly 21%. Lack of gel also negatively impact population  
579 growth, resulting in a 13% reduction relative to controls. The effect of thermal stress on egg viability  
580 would reduce population growth by 8%. In spite of these scenarios, populations would still be expected  
581 to increase in abundance under each specific stress. Under the “worst case scenario” where fecundity is  
582 reduced by male and female dehydration, larval survival is reduced by thermal stress, and there is a lack  
583 of gel reducing egg survival, population growth rate is negative ( $\lambda = -0.95$ ), indicating declining  
584 population size. We note that all these growth rates are fairly liberal because of the relatively short time  
585 over which larval survival was observed (12 days) relative to the time spent as larvae in nature. In  
586 addition, it is likely that other factors, such as starvation, freezing, or pathogen attack, could occur,  
587 resulting in additive impacts on population growth.

588

#### 589 4 DISCUSSION

590 This study examined reproductive biology of the Antarctic midge with the goal of establishing key  
591 molecular mechanisms associated with male and female biology. Combined RNA-seq and proteomics  
592 established the transcriptional components of reproduction and protein constituents deposited in the  
593 gel surrounding the egg. Specifically, we examined whether the gel that encases the eggs alters egg  
594 viability and larval survival and examined the impact of larval dehydration exposure on adult fertility.  
595 Little is known about midge reproductive biology and we have summarized the major findings of this  
596 study in Figure 15. Thus, this study will hopefully provide a foundation for the fields of Antarctic and  
597 midge reproductive biology. Lastly, we modeled the impact of multiple reproductive factors on  
598 population growth, each of which exert minor effects but in combination could yield a negative growth  
599 rate. Our results highlight the importance of understanding the reproductive biology of this Antarctic  
600 insect, a species restricted to a limited geographic region and a specific habitat.

601 The large proportion of apparently conserved, female-specific or female-enriched genes that are  
602 uncharacterized ( $\approx 44\%$ ) suggests there are many aspects of *Belgica* female physiology that remain  
603 poorly understood. However, the results of the GO analysis of the female-enriched gene set are  
604 consistent with results reported for *Drosophila* and other insect systems (Attardo et al., 2019; Olafson et  
605 al., 2019; Panfilio et al., 2019; Swanson, Wong, Wolfner, & Aquadro, 2004). In an analysis of genes  
606 differentially expressed between germline-naive and gonadectomized females in *Drosophila*, Parisi et al.  
607 found enrichment in terms associated with metabolism (Parisi et al., 2004) . In fact, genes associated  
608 with energy storage and utilization, such as digestive proteases or lipid storage genes, showed increased  
609 expression in germline-naive males and females. This suggests that enrichment of such genes would be  
610 expected in the larval gene set, even if adult *Belgica* were active eaters which they are not. Indeed, the  
611 larva enriched gene set is replete with putative trypsins, chymotrypsin like proteins, and lipases (Cao &

612 Jiang, 2017; Graveley et al., 2011; McKenna et al., 2016; Pauchet et al., 2010; Venancio, Cristofolletti,  
613 Ferreira, Verjovski-Almeida, & Terra, 2009). Oogenic gene expression has also been linked to nutrient  
614 sensing in *Drosophila* (Shim, Gururaja-Rao, & Banerjee, 2013; Terashima & Bownes, 2005). Enrichment  
615 of terms associated with metabolism, including components of ribosomes as protein-building  
616 machinery, identified in *B. antarctica* is most likely associated with oogenesis-related biosynthesis. This  
617 could include mobilizing lipids and proteins from the adult fat body during vitellogenesis, as well as  
618 synthesis of components of the egg gel excreted from the accessory gland. Transcription factor analyses  
619 revealed a subset of genes likely to have critical roles in female biology and thus warrant further more  
620 directed studies. One identified was mothers against decapentaplegic (Mad) homolog 1, which likely is  
621 likely critical for development (Newfeld, Chartoff, Graff, Melton, & Gelbart, 1996; Xie & Spradling, 1998).

622 Many enriched GO terms can also be tied to gametogenesis and embryogenesis or *Belgica*  
623 females. Terms associated with cell cycle control and DNA/RNA/chromatin handling are among the main  
624 examples. Beyond meiotic divisions that result in formation of gametes, which of course takes place in  
625 the male as well, female may have to exercise more precise control over the timing of oocyte  
626 maturation, deploying cell-cycle modulators, transcription regulation machinery, and/or RNA silencing  
627 factors (Lefebvre & Lécuyer, 2018; Qazi, Heifetz, & Wolfner, 2003; Soller, Bownes, & Kubli, 1999). TF  
628 analyses revealed a NF-kappa relish-like transcription factor as a potential regulator of transcript levels  
629 for the female-enriched gene set. Indeed, NF-kappaB transcription factors play well-established roles in  
630 transcriptional regulation of cytokines, molecules involved in cell cycle control, and development  
631 (Gilmore, 2006; Kim & Kim, 2005; Sosic & Olson, 2003). Curiously, this TF has its highest expression in  
632 males despite a paucity of binding sites in the regulatory regions of the male-enriched gene set.  
633 However, expression in the male accessory gland is limited and lower than that of the female or female

634 accessory gland. The meaning of these findings remains unclear, but indicate a potential critical role  
635 related to accessory gland function in *Belgica*.

636           The female also produces developmental factors that play a role in successful embryogenesis,  
637 such as mRNAs, hormone biosynthesis precursors, and general cytoplasmic components (sperm are  
638 quite cytoplasm-poor relative to eggs) (Swevers, Raikhel, Sappington, Shirk, & Iatrou, 2005). Among the  
639 most highly enriched genes in females relative to males (>1000 fold higher) are a handful of genes  
640 known to be involved in embryonic patterning in insects, such as *nanos*, *oskar*, and multiple innexins,  
641 components of invertebrate gap junctions involved in intercellular communication during  
642 embryogenesis (Bauer et al., 2005; De Keuckelaere, Hulpiau, Saeys, Berx, & Van Roy, 2018; Güiza, Barria,  
643 Saez, & Vega, 2018; Quinlan, 2016; Richard & Hoch, 2015). This lends support to the notion that the  
644 female-enriched gene set is comprised largely of genes regulating and supporting oogenesis and  
645 embryogenesis. In addition, paternal DNA must be de-compacted after fertilization, meaning that sperm  
646 nucleotide binding proteins must be degraded (Doyen et al., 2015). The enzymes/proteins that  
647 participate in this process are likely already present in the egg, and therefore maternally contributed  
648 (Tirmarche, Kimura, Dubruille, Horard, & Loppin, 2016). This is followed by histone/chromatin assembly  
649 which is dependent on maternally provided histones and nucleosome assembly factors (Loppin,  
650 Dubruille, & Horard, 2015; Tirmarche et al., 2016). Male-contributed mitochondrial DNA must also be  
651 degraded (DeLuca & O'Farrell, 2012; Sato & Sato, 2011). This further accounts for the prevalence of  
652 terms associated with histones and chromosome organization. Finally, in *Drosophila*, nurse cells  
653 surrounding the oocyte are known to polyploidize regions of their nuclear DNA to enhance transcription  
654 and support provisioning of the oocyte (Bastock & St Johnston, 2008; Kaulenas, 1992; Orr-Weaver,  
655 2015). This provides yet another physiological link to DNA replication and chromosome organization, but

656 chironomids lack nurse cells. It is uncertain whether other cells of the ovary act in a similar manner to  
657 *Drosophila* nurse cells (Bastock & St Johnston, 2008).

658           The dominant GO terms associated with the male-enriched gene set are ‘anion transport’ and  
659 ‘carboxylic acid biosynthesis.’ These are both terms that can be linked to spermatogenesis and may also  
660 be linked to the differing metabolic needs of males, females, and larvae: larvae eat, digest, and grow;  
661 females conduct vitellogenesis, oogenesis, and embryogenesis; and males likely devote the bulk of their  
662 energy store to spermatogenesis and mating (Perry, Harrison, & Mank, 2014). The two terms may be  
663 interrelated. For example, genes involved in synthesis and transport of pyruvate, a carboxylate anion  
664 and the starting substrate of the tricarboxylic acid (TCA) cycle, could be associated with either GO term.  
665 The functional role of pyruvate metabolism in sperm viability is not known, but mitochondrial activity is  
666 demonstrated to be important for fertility, and a mitochondrial pyruvate transporter that is almost  
667 uniquely expressed in the male germline has been identified in placental mammals (Vanderperre et al.,  
668 2016). However, inhibition of pyruvate transporters in the mitochondrial membrane does not appear to  
669 affect sperm motility, lending support to the notion that sperm motility is fueled primarily by glycolysis  
670 (not import of pyruvate into mitochondria) (Vanderperre et al., 2016); alternatively, amino acid  
671 metabolism may play a role in motility, as it has been associated with sperm motility in *An. gambiae*  
672 (Izquierdo et al., 2019). TCA-based energy production must play a role in some other aspect of sperm  
673 viability (Vanderperre et al., 2016). The fact that a mitochondrial pyruvate transporter is important in  
674 sperm viability suggests that pyruvate transport and metabolism contribute to the significance of the GO  
675 terms ‘tricarboxylic acid cycle,’ ‘monocarboxylic acid metabolic process,’ and ‘anion transport.’  
676 Additionally, sperm are thought to take up lactate and pyruvate through general monocarboxylic acid  
677 transporters (MCTs) in humans (Ramalho-Santos et al., 2009; Rato et al., 2012; Vanderperre et al.,  
678 2016). Perhaps there is an analogous uptake of energetically important organic acids in the seminiferous

679 tubules of *Belgica* and other insects. Finally, pyruvate may be useful in supplying Acetyl-CoA for the  
680 histone acetylation that is essential for chromatin condensation during spermatogenesis (Ramalho-  
681 Santos et al., 2009; Rato et al., 2012; Vanderperre et al., 2016).

682 Overall, males showed far fewer genes with enriched expression relative to the female than vice  
683 versa. Of the 12 genes that are >1000 fold higher in the male compared to other stages, three are  
684 putative metalloendopeptidases. These may be involved in the proteolytic processing of amyloid  
685 precursor proteins (APPs), which are integral components of sperm membranes in humans, though their  
686 specific roles have not been determined (Silva et al., 2015). Also of interest in this small set of highly  
687 enriched genes are a few genes commonly, though not exclusively, associated with immunity: a leucine  
688 rich immune protein TM, a toll protein, and an apparent homolog of the transcription factor NF-X1  
689 (Brucker, Funkhouser, Setia, Pauly, & Bordenstein, 2012; De Gregorio, Spellman, Rubin, & Lemaitre,  
690 2001; Irving et al., 2001; Palmer & Jiggins, 2015). This transcription factor binds X-box motifs to regulate  
691 many eukaryotic genes and is generally thought to be a negative regulator of transcription (Stroumbakis,  
692 Li, & Tolia, 1996). The homolog of this transcription factor identified in *D. melanogaster*, named  
693 shuttlecraft (stc), is essential for normal embryonic development and is expressed most highly in the  
694 embryo CNS. Moreover, expression of this gene is highest in the ovary, and the promoters of many  
695 maternally contributed genes known to be crucial in embryonic development contain X-box motifs, such  
696 as *oskar*, *torpedo*, *pumilio*, and vitelline membrane proteins (Stroumbakis et al., 1996). Therefore it is  
697 tempting to suggest that, unlike in *Drosophila*, it is for some reason the male who produces this critical  
698 TF, transferring it to the female during copulation in order to trigger or facilitate proper development of  
699 their progeny. In support of the notion that the NF-X1 gene product is transferred to the female during  
700 copulation, expression of the gene is roughly 24-fold higher in the male accessory gland than in the  
701 whole carcass.



702 Gene ontology analysis of the larvae-enriched gene set revealed a preponderance of terms  
703 related to peptidase, hydrolase, and detoxification activity. These GO terms are related to digestion and  
704 detoxification of ingested materials by the growing larvae – neither of which would be relevant issues  
705 for the non-feeding adults. One cytochrome p450s (CYP6Z2), up-regulated in larvae, has been implicated  
706 in chemical resistance in *Anopheles* mosquitoes (Malik et al., 2016) and therefore may be critical for  
707 larval survival in their potentially toxic microhabitat, such as seabird guano (Rial et al., 2016).

708 Besides the ingestion of food, larvae of *B. antarctica* are also longer-lived and must face the  
709 seasonal challenges of permanent residence in Antarctica (Edwards, & Baust, 1981; Sugg et al., 1983). In  
710 particular, larvae must survive freezing and desiccation during the austral winter along with potential  
711 thermal stress during summer (Benoit et al., 2009; Benoit, Lopez-Martinez, Michaud, et al., 2007; Lopez-  
712 Martinez et al., 2008; Michaud et al., 2008; Rinehart et al., 2006; Teets, Kawarasaki, Lee, & Denlinger,  
713 2013). Genes enhancing survival under these conditions, such as heat shock proteins (Benoit et al.,  
714 2009; Benoit, Lopez-Martinez, Michaud, et al., 2007; Lopez-Martinez et al., 2008; Michaud et al., 2008;  
715 Rinehart et al., 2006; Teets et al., 2013), are expected to be up-regulated by larvae. Based on previous  
716 studies in *Belgica* and other species that are desiccation and freeze tolerant, genes of importance could  
717 include oxido-reductase related enzymes (e.g. cytochrome p450s), Late Embryogenesis Abundant (LEA)  
718 proteins, protein repair methyltransferases, hemoglobins, aquaporins, and enzymes involved in  
719 trehalose metabolism (Benoit et al., 2009; Benoit, Lopez-Martinez, Michaud, et al., 2007; Dunning et al.,  
720 2013; Lopez-Martinez et al., 2008; Lv et al., 2010; Michaud et al., 2008; Rinehart et al., 2006; Ronges,  
721 Walsh, Sinclair, & Stillman, 2012; Teets et al., 2013; J. Zhang, Marshall, Westwood, Clark, & Sinclair,  
722 2011). Many of these categories are indeed enriched in the larvae and are likely substantial factors in  
723 the stress resistance abilities of *B. antarctica*. Note that the presence of hemoglobin in insect  
724 hemolymph is unique to chironomids (Gusev et al., 2014; Kaiser et al., 2016; S.-M. Lee, Lee, Park, & Choi,

725 2006) and furthermore it is thought to be unique to the larval stage. This could partially explain the  
726 prevalence of iron binding as a GO term enriched in the larvae and conserved among the midge species  
727 analyzed (Gusev et al., 2014; Kaiser et al., 2016; Lee et al., 2006).

728 Most prevalent among GO terms enriched in the larval gene set are those associated with  
729 aminoglycan metabolism. This set includes, for example, multiple putative N-  
730 acetylgalactosaminyltransferases, which catalyze the initial glycosylation of serine and threonine  
731 residues (Tran & Ten Hagen, 2013). Mucin type O-glycosylation occurs commonly on proteins with  
732 extracellular domains, comprising a portion of the extracellular matrix, and it is thought to be important  
733 in intercellular communication and adhesion (Tran & Ten Hagen, 2013). In *Drosophila*, enzymes  
734 responsible for building glycosylated proteins, such as mucins, are critical for embryonic development,  
735 particularly for the CNS (Tian & Hagen, 2007; Tran & Ten Hagen, 2013; Zhang, Zhang, & Ten Hagen,  
736 2008). Maternal and zygotic O-linked glycans have also been implicated in proper respiratory  
737 development. These O-glycans are termed *pgant* in *Drosophila* (Tian & Hagen, 2007; Tran & Ten Hagen,  
738 2013; Zhang et al., 2008). One essential gene, *pgant4*, is involved in regulating gut acidification, but this  
739 is not the only such gene required in the digestive system (Tran & Ten Hagen, 2013; Tran et al., 2012).  
740 The larva enriched gene set in *Belgica* includes putative homologs of *pgant4* and *pgant6*, as well as the  
741 essential genes CG30463 and C1GalTA, both involved in mucin type O-linked glycosylation. However,  
742 larva-enriched GO terms, as mentioned above, are dominated by hydrolysis and catabolic processes,  
743 including glycosaminoglycan catabolism. This may be a sign of the breakdown of extracellular materials  
744 associated with growth and development or an indication of a diet rich in aminoglycans.

745 Composition of male accessory glands has been a major focus in numerous insects. These  
746 products influence fertilization rates, subsequent female receptivity to courtship, and are critical in the  
747 composition of the spermatophore (Alfonso-Parra et al., 2016; Avila et al., 2011; Dottorini et al., 2007;

748 Gabrieli et al., 2014; Izquierdo et al., 2019; McGraw et al., 2008; Mitchell et al., 2015; Ravi Ram &  
749 Wolfner, 2007; Rogers et al., 2008; Sirot, Wong, Chapman, & Wolfner, 2015; Thailayil et al., 2011;  
750 Villarreal et al., 2018). Many of the male accessory gland genes from *Belgica* have orthologs based on  
751 predicted genes from midge and mosquito genomes, but few overlapping orthologs were identified that  
752 are expressed in the male accessory gland of *B. antarctica* compared to the male reproductive tissues of  
753 mosquitoes (Izquierdo et al., 2019; Papa et al., 2017). This is not surprising since a similar lack in  
754 orthology among male accessory gland products has been observed between *Drosophila* and *Glossina*  
755 and other higher flies (Attardo et al., 2019; Scolari et al., 2016). We did not conduct biological  
756 examination of specific roles for accessory gland proteins from *B. antarctica*, such as whether their  
757 transfer during mating impacts refractoriness of females, as noted in many species (Avila et al., 2011;  
758 Baldini, Gabrieli, Rogers, & Catteruccia, 2012; Ravi Ram & Wolfner, 2007; Sirot et al., 2015). There is an  
759 enrichment for genes associated with glycoprotein synthase, which is unsurprising as glycoproteins are  
760 common constituents of seminal fluid (Avila et al., 2011; Poiani, 2006). In addition, there were specific  
761 serine proteases, immune factors, and products involved in response to oxidative stress. These are  
762 similar to those observed in other fly species (Avila et al., 2011; Baldini et al., 2012; Ravi Ram & Wolfner,  
763 2007; Sirot et al., 2015; Tian et al., 2017) and likely serve to preserve sperm viability but could impact  
764 other aspects such as female biology (Abraham et al., 2016; Denis et al., 2017). These factors are likely  
765 critical to male success, as this midge will mate on multiple occasions. It is important to note that  
766 females will deposit eggs with and without fertilization (Harada et al., 2014), thus suggesting that factors  
767 supplied in the spermatophore are not essential for ovulation and oviposition as in other fly species  
768 (Avila et al., 2011; Baldini et al., 2012; Ravi Ram & Wolfner, 2007; Sirot et al., 2015).

769 Our gene expression analysis is one of the few that has explicitly examined gene expression  
770 within the female accessory gland. Many, but not all, products present within the gel were expressed in

771 the female's accessory gland. A comparison of our results to expression pattern in mosquito female  
772 tracts (Papa et al., 2017) revealed few genes with overlapping expression(Papa et al., 2017). Few studies  
773 in other flies explicitly examined products generated by the female's accessory gland. Even in  
774 *Drosophila*, the female accessory gland (paraovaria) remains one of the most understudied organs  
775 (Attardo et al., 2014). In tsetse flies, this organ provides nourishment to developing intrauterine larvae  
776 (Attardo et al., 2019; Benoit et al., 2015 ; Attardo et al., 2014 ), but there are no similarities, beyond  
777 standard housekeeping genes, between this organ in tsetse flies and *B. antarctica*. Of interest,  
778 regulation of transcript expression within the female accessory gland seems to be conserved (Attardo et  
779 al., 2014), suggesting that regulatory aspects may be similar but drive expression of specific genes  
780 related to unique functions of this organ in different flies. Transcription factor analyses identified a  
781 single gene (IU25\_08656) that has enriched levels of both binding sites upstream of female accessory  
782 gland enriched genes and is itself expressed in the female accessory gland. This is an uncharacterized  
783 zinc finger proteins, but is likely to have a critical role in female reproductive function for *B. antarctica*.

784         The three major protein components of the gel are vitellogenin, larval serum protein, and  
785 apolipoporphin, all which are reasonable components of a gel whose primary function includes fueling  
786 the development of larvae upon hatching. *Belgica* larvae exhibit "drinking behavior" shortly before  
787 hatching, suggesting that up to this point embryonic development is fueled by nutrient reserves present  
788 in the egg at the time of oviposition (Harada et al., 2014). Upon hatching, the gel is ingested by the larva,  
789 making it the first meal fueling their development. Larval serum protein likely acts as an amino acid  
790 reservoir, while vitellogenin and apolipoproteins could provide fatty acid, sugar, and protein reserves.  
791 The gel may also contribute other elements in smaller amounts, such as pre-synthesized developmental  
792 hormones in an inactive form, hormone precursors, proenzymes, and enzyme cofactors that are  
793 important for continued development (Harada et al., 2014). Larval serum protein is a storage protein

794 belonging to the family of hexamerins (Burmester, 1999; Burmester et al., 1998; Telfer & Kunkel, 1991).  
795 Genes for such proteins are often highly expressed in the final larval instar preceding pupation  
796 (Burmester, 1999; Burmester et al., 1998; Telfer & Kunkel, 1991) and serve as a nutrient reserve for  
797 developing pupae and newly emerged adult. During the sweeping morphological changes that  
798 accompany metamorphosis in holometabolous insects like *Belgica*, such storage proteins are extracted  
799 from the larval fat body, transferred into the hemolymph, and subsequently re-sequestered in the newly  
800 formed adult fat body (Burmester, 1999; Burmester et al., 1998; Keeley, 1978; Larsen, 1976; Telfer &  
801 Kunkel, 1991). The following scenario is the likely fate of the larval serum protein found in the egg gel:  
802 Initially re-sequestered by the adult fat body and shuttled to the female accessory gland with  
803 vitellogenin, or possibly sequestered in the female accessory gland during adult development after  
804 pupation without a layover in the fat body. Importantly, lack of expression in the female adult indicates  
805 these proteins must be synthesized in the larva for subsequent use by the adult.

806         Along with establishing components of the female accessory gland derived gel, a major goal of  
807 this study was to identify functional roles of this gel and to determine if the gel components are  
808 impacted by stress in the developing larvae. Based on our results, one of the main functions of the gel is  
809 to provide a nutritional resource, which leads to a higher larval survival. Products of the accessory  
810 glands of females have been documented as food sources for insect species among many orders (Attardo  
811 et al., 2019; Benoit et al., 2015 ; Denlinger & Ma, 1974; Kaiwa et al., 2014; Ma, Denlinger, Jarlfors, &  
812 Smith, 1975). Production of gel substances surrounding eggs have been noted in other species, such as  
813 in stink bugs, where the gel serves as a source of nutrition, protects the eggs, and provides a vehicle to  
814 transfer microbial symbionts (Kaiwa et al., 2014). Similar to our study, removal of the gel inhibits  
815 juvenile development in stink bugs, but in contrast, removal of the gel around the stink bug eggs has  
816 little impact on hatching success. In addition to providing a critical nutritional source and preventing

817 dehydration, we show that the egg gel acts as a thermal buffer that limits temperature extremes. Our *de*  
818 *novo* assembly of the female accessory gland failed to detect signatures of microbial symbionts within  
819 the gel, indicating that the gel does not serve as a mechanism of bacterial transfer to the developing  
820 larvae. This lack of microbial presence could very well limit microbial exposure of the midge until after  
821 larvae emerge from the gel. Accessory gland products also have been demonstrated to possess  
822 antimicrobial properties (Avila et al., 2011; Otti, McTighe, & Reinhardt, 2013; Otti, Naylor, Siva-Jothy, &  
823 Reinhardt, 2009); this is a possibility for *B. antarctica* because immune peptides are present in the gel.

824 Larval dehydration stress had a major impact on fertility of both adult males and females. The  
825 most likely cause of reduced fecundity in males and females is a direct reduction in larval serum protein,  
826 a hexamerin that acts as a storage protein in larvae (Burmester, 1999; Burmester et al., 1998; Telfer &  
827 Kunkel, 1991). This hexamerin represents one of the highest expressed transcripts in developing larvae,  
828 so its accumulation during the juvenile stages is likely a critical resource for production of eggs and  
829 accessory gland components. This effect is likely even more pronounced in *B. antarctica* because adults  
830 do not feed or even readily drink water (Benoit, Lopez-Martinez, Elnitsky, Lee, & Denlinger, 2007). Along  
831 with acting as a nutritional source, the larval serum protein generated in juvenile stage of females is  
832 likely incorporated into the accessory gland gel, suggesting that a reduction in this product may directly  
833 impact gel composition. Larval nutritional status has a direct impact on fecundity in numerous insect  
834 systems (Aguila, Hoshizaki, & Gibbs, 2013; Aguila, Suszko, Gibbs, & Hoshizaki, 2007; Rosa &  
835 Saastamoinen, 2017), including other midges (Sibley et al., 2001). To the best of our knowledge, larval  
836 dehydration has not previously been examined in relation to subsequent adult fecundity. Other stressful  
837 conditions, such as chemical exposure, have impaired both larval development and subsequent adult  
838 reproduction in a non-biting midge, *Chironomus riparius* (Vogt et al., 2007).

839           This study provides an encompassing view of reproductive biology of the Antarctic midge, from  
840 molecular mechanisms to the impact of larval stress exposure on adult fecundity. Key findings are  
841 summarized in Figure 15. This is followed by population growth modeling to establish how these factors  
842 directly impact persistence of this insect in its limited Antarctic range. Population modeling revealed  
843 that each factor (dehydration stress, lack of gel, thermal buffering), by itself, has a small impact on  
844 population growth but combined factors likely result in negative population growth. The limited  
845 reproductive window of 2-3 weeks makes understanding both male and female reproduction critical for  
846 understanding how this midge survives in Antarctica. Studies on the reproductive biology of flies have  
847 been limited largely to *Drosophila* and disease vectors (sand flies, mosquitoes, etc.), and our results  
848 expand into Chironomidae to provide the groundwork for future studies with this dipteran system.

849

## 850 **ACKNOWLEDGEMENTS**

851 This work was supported by the National Science Foundation grant DEB-1654417 (partially) and United  
852 States Department of Agriculture 2018-67013 (partially) to J.B.B., National Science Foundation grant  
853 OPP-1341393 to D.L.D., and National Science Foundation grant OPP-1341385 to R.E.L. We thank the  
854 staff at Palmer Station, Antarctica for assistance in logistics, experiments, and helping make the field  
855 season a pleasant experience.

856

## 857 **AUTHOR CONTRIBUTION**

858 This study was designed and conceived by J.B.B. The manuscript was written by G.F. and J.B.B. RNA-seq  
859 studies were conducted by G.F., A.J.R., B. D., and S.T.B. Molecular and physiological studies were

860 conducted and interpreted by S. N., C. P., G. F., C.J.H, E.M.D., and J.B.B. Transcription factor analyses  
861 were contributed by X.C. and M.T.W. and interpreted by J.B.B. and G.F. Additional data and statistical  
862 analyses were conducted by K.J.O., G.M.A., and J.B.B. Samples were collected by J.D.G., D.S., R.E.L., and  
863 D.L.D. Population modeling was conducted by S.F.M. Figures were prepared by G.F. and J.B.B.  
864 Illustrations were by G.M.A. All authors were responsible for editing the manuscript and have approved  
865 publication.

866

#### 867 **DATA AVAILABILITY STATEMENT**

868 All data generated for this project have been submitted to NCBI or made available in the supplemental  
869 files.

870

871

872

873

874

875

876

877



878 **FIGURE LEGENDS**

879 **Figure 1: Antarctic midge, *Belgica antarctica*, during reproduction.** A. Mating pair, male on left. Inset,  
880 spermatophore transferred to females immediately after copulation. Image is posterior end of female  
881 and white material is the spermatophore. B. Female depositing eggs and accessory gland-derived gel. C.  
882 Accessory gland (left middle, b) and ovaries (top left and right, a) of gravid females 3 days after adult  
883 eclosion. D. Female accessory glands (left, a) and ovaries (top and right, b) following egg and gel  
884 deposition. E. Egg mass following the completion of deposition. F. Male reproductive tract, a. testes, b,  
885 accessory gland, and c, common duct.

886

887 **Figure 2: Gene expression heat map of Antarctic midge, *Belgica antarctica*, during development,**  
888 **between sexes, and for accessory glands.** Hierarchical clustering of RNA-seq gene expression patterns  
889 for males, females, larvae, and accessory glands based on sample distance (Euclidean distance matrix) of  
890 differentially expressed contigs.

891

892 **Figure 3: Genes uniquely enriched for the Antarctic midge, *Belgica antarctica* in males, females, and**  
893 **larvae and associated gene ontology enrichment.** A. Gene enriched in males (left) and gene ontology  
894 (right), B. Gene enriched in females (left) and gene ontology (right), C. Gene enriched in larvae (left) and  
895 gene ontology (right). Each box represents a specific category and color represent major GO groups.

896

897 **Figure 4: Genes uniquely enriched in the Antarctic midge, *Belgica antarctica*, female and male**  
898 **accessory glands and associated gene ontology enrichment.** A. Genes enriched in female accessory

899 glands (left) and gene ontology (right), B. Genes enriched in male accessory gland (left) and gene  
900 ontology (right). GO conducted with g:Prolifer (Raudvere et al., 2019).

901

902 **Figure 5: Weighted gene co-expression network analysis (WGCNA) across developmental stages and**  
903 **for male and female accessory glands of the Antarctic midge, *Belgica antarctica*.** A. Average linkage  
904 hierarchical clustering dendrogram of the genes. Modules, designated by color code, are branches of the  
905 clustering tree. B. Correlation of module eigengenes to developmental and accessory gland traits. Each  
906 row corresponds to a module eigengene and columns are traits. \*, represents values with a significant  
907 positive correlation for Pearson  $r$  ( $P < 0.05$ ). C. Unsupervised hierarchical clustering heatmap (bottom)  
908 and dendrogram (top) of module eigengenes and traits. Gene ontology (GO) analysis of eigengenes  
909 associated with larvae (D), males (E), and females (F). GO conducted with g:Prolifer(Raudvere et al.,  
910 2019) and visualized with REVIGO(Supek, Bošnjak, Škunca, & Šmuc, 2011).

911

912 **Figure 6: Proteomic analysis of female accessory gland derived gel material from the Antarctic midge,**  
913 ***Belgica antarctica*.** A. Female depositing eggs with gel and protein components of two gel samples  
914 without eggs. B. Identification of proteins that represent at least 3% of total protein composition of the  
915 accessory gland gel. C. Congruence of protein abundance and content between two gel samples. D.  
916 Heatmap for transcript levels of gel-specific genes among larvae, females, males, and accessory glands.  
917 E. qPCR validation of RNA-seq data. All tested genes have Pearson correlation coefficients over 0.85. Gel  
918 specific genes have a Pearson correlation of 0.87.

919

920 **Figure 7: Transcription factors (TFs) and TF binding sites associated with reproduction in the Antarctic**  
921 **midge, *Belgica antarctica*.** A. Relative abundance of transcription factors encoded by genomes of  
922 midges and mosquitoes. TF families towards the top contain more TFs in *B. antarctica*. B. Enrichment  
923 for specific TF binding site motifs in regulatory regions (2000 bp; 500 bp data not shown due to overlap  
924 with 2000 bp) of genes expressed highly in specific stages and accessory glands. Groups of TFs are  
925 separated by their motif enrichment profiles across samples. Those highlighted in orange are  
926 significantly enriched within the specific stage or tissue. Scale for heatmap is set at relative abundance  
927 on a Z scale of -2 to 2 across each row. C. Transcript levels of select TFs with significant motif enrichment  
928 in the promoters of genes expressed in specific tissues (orange font color in panel B). Scale for heatmap  
929 is set at relative abundance on a Z scale of -2 to 2 across each row. MAG, male accessory gland; FeAG,  
930 female accessory glands.

931

932 **Figure 8: Comparative analysis of female, male, and larvae-specific gene sets with mosquitoes and**  
933 **midges to Antarctic midge, *Belgica antarctica*.** A. Female-specific genes compared to midges (left),  
934 mosquitoes (middle), and genes with enriched expression in the female reproductive tract (FRT) of  
935 mosquitoes (right) (Papa et al., 2017). B. Male-specific genes compared to midges (left), mosquitoes  
936 (middle), and genes with enriched expression in the male reproductive tract (MRT) of mosquitoes  
937 (right)(Papa et al., 2017). C. Larvae-specific genes compared to midges (left) and mosquitoes (right).  
938 Protein sequences were defined as orthologs if they had reciprocal-best BLASTp hits with an e-value <  
939  $10^{-10}$ .

940

941 **Figure 9: Comparative analysis of accessory gland gene sets with mosquitoes and midges to the**  
942 **Antarctic midge.** A. Female accessory gland genes compared to midges (left), mosquitoes (middle), and  
943 genes with enriched expression in the female reproductive tract of mosquitoes (right) (Papa et al.,  
944 2017). B. Male accessory gland genes compared to midges (left), mosquitoes (middle), and genes with  
945 enriched expression in the male reproductive tract of mosquitoes (right) (Papa et al., 2017). C. Overlap  
946 between genes expressed in male accessory glands between mosquitoes and *B. antarctica*. Left, highly  
947 enriched in *Anopheles* male accessory gland. Right, enriched in *Anopheles* male accessory gland.  
948 Enrichment for *Anopheles* male accessory gland genes is based on values from Izquierdo et al. (2019).  
949 Protein sequences were defined as orthologs if they had reciprocal-best BLASTp hits with an e-value <  
950  $10^{-10}$ .

951

952 **Figure 10: Expression changes in gel-associated proteins in larvae following dehydration stress.** A.  
953 Transcript level changes in larvae for gel proteins following dehydration stress. RNA-seq studies were  
954 acquired from Teets et al. (2012). Orange denotes significance between control and dehydrated larvae  
955 based on RNA-seq analyses. B. Heat map of transcript levels for gel-associated proteins during  
956 dehydration (D) and cryoprotective dehydration (CD) compared to control (C) that are components of  
957 the gel proteome and significantly altered by dehydration. C. Total mass before eclosion, D. post-  
958 eclosion total mass, E. mass change after eclosion, and total egg production in females when control  
959 (non-dehydrated) and dehydrated larvae were allowed to complete development. Analysis of variance  
960 was utilized to examine statistical differences with the use of R statistic packages. Bars above indicate  
961 significance at  $P < 0.05$ .

962

963 **Figure 11: Impact of larval dehydration stress on male fertility.** A. Expression profiles of male-  
964 associated genes with expression differences after larval dehydration (D, dehydration, C, control, and  
965 CD, cryoprotective dehydration, MAG, male accessory gland). B. Mass of males used in mating  
966 experiments from dehydrated or control larvae. C. Female fertility (control or dehydrated) following  
967 copulation with dehydrated or control males. Analysis of variance was utilized to examine statistical  
968 differences with the use of R statistic packages. Bars above indicate significance at  $P < 0.05$  unless  
969 otherwise noted.

970

971 **Figure 12: Accessory gland gel is critical for larval development.** A. Amino acid composition and  
972 putative phosphate and glycosylation sites of gel proteins based on sequence information. Relative  
973 amounts are based on comparison levels between columns. B. Survival of developing larvae with (black)  
974 and without (gray) gel presence at larval ecdysis. Open circles are the average and filled circles are each  
975 replicate. C. Larvae length after 20 days with and without gel at larval ecdysis. Bar indicates significance  
976 at  $P < 0.05$ . Analysis of variance was utilized to examine statistical differences with the use of R statistic  
977 packages. Bars above or beside indicate significance at  $P < 0.05$ .

978

979 **Figure 13: Role of accessory gland gel in relation to thermal buffering of eggs.** A. Thermal profile within  
980 (orange) and outside (blue) gel-egg mixture under field conditions, B. Egg viability following exposure to  
981 20°C for three hours. Eggs without gel (constant) were held at 4°C for the duration of the trial. Maximum  
982 temperature change during 24 hour period. D. Rate of temperature change (minimum to maximum).  
983 Analysis of variance was utilized to examine statistical differences with the use of R statistic packages. \*  
984 above indicates significance at  $P < 0.05$  unless otherwise noted.

985

986 **Figure 14: Population growth is impacted by dehydration and thermal stress in developing larvae.** A.

987 Population growth following altered egg production due to dehydration exposure as larvae in males,

988 females, and both sexes combined compared to control (no dehydration of larvae). B. Growth based on

989 the presence or absence of the gel under favorable conditions. C. Impact of thermal stress on egg

990 viability with and without accessory gland gel.

991

992 **Figure 15: Summary of Antarctic midge reproduction.** Larval development (four stages) is condensed

993 into a single representation of all stages. Adults live approximately two-three weeks. Egg development

994 occurs over thirty days. Impact of specific conditions are highlighted based on experimental evidence

995 from this study.

996

997 **Supplemental table 1.** RNA-seq results for complete *Belgica antarctica* gene set. Expression values are

998 in transcripts per million. RNA-seq datasets are available under the following NCBI Bioprojects

999 PRJNA174315 and PRJNA576639.

1000

1001 **Supplemental table 2-** BLAST results for female accessory gland specific *de novo* transcriptome against

1002 bacterial sequences from the NCBI nr database.

1003

1004 **Supplemental table 3.** RNA-seq results for female-enriched *Belgica antarctica* gene set. Expression  
1005 values are in transcripts per million. RNA-seq datasets are available under the following NCBI Bioprojects  
1006 PRJNA174315 and PRJNA576639.

1007

1008 **Supplemental table 4.** RNA-seq results for male-enriched *Belgica antarctica* gene set. Expression values  
1009 are in transcripts per million. RNA-seq datasets are available under the following NCBI Bioprojects  
1010 PRJNA174315 and PRJNA576639.

1011

1012 **Supplemental table 5.** RNA-seq results for larvae-enriched *Belgica antarctica* gene set. Expression  
1013 values are in transcripts per million. RNA-seq datasets are available under the following NCBI Bioprojects  
1014 PRJNA174315 and PRJNA576639.

1015

1016 **Supplemental table 6.** RNA-seq results for female accessory gland-enriched *Belgica antarctica* gene set.  
1017 Expression values are in transcripts per million. RNA-seq datasets are available under the following NCBI  
1018 Bioprojects PRJNA174315 and PRJNA576639.

1019

1020 **Supplemental table 7.** RNA-seq results for male accessory gland-enriched *Belgica antarctica* gene set.  
1021 Expression values are in transcripts per million. RNA-seq datasets are available under the following NCBI  
1022 Bioprojects PRJNA174315 and PRJNA576639.

1023

1024 **Supplemental table 8.** WGCNA module results for female-enriched *Belgica antarctica* gene set.

1025 Expression values are in transcripts per million. RNA-seq datasets are available under the following NCBI

1026 Bioproject PRJNA174315 and PRJNA576639.

1027

1028 **Supplemental table 9.** WGCNA module results for male-enriched *Belgica antarctica* gene set. Expression

1029 values are in transcripts per million. RNA-seq datasets are available under the following NCBI Bioprojects

1030 PRJNA174315 and PRJNA576639.

1031

1032 **Supplemental table 10.** WGCNA module results for larvae-enriched *Belgica antarctica* gene set.

1033 Expression values are in transcripts per million. RNA-seq datasets are available under the following NCBI

1034 Bioproject PRJNA174315 and PRJNA576639.

1035

1036 **Supplemental table 11.** WGCNA module results for female accessory gland-enriched *Belgica antarctica*

1037 gene set. Expression values are in transcripts per million. RNA-seq datasets are available under the

1038 following NCBI Bioproject PRJNA174315 and PRJNA576639.

1039

1040 **Supplemental table 12.** WGCNA module results for male accessory gland-enriched *Belgica antarctica*

1041 gene set. Expression values are in transcripts per million. RNA-seq datasets are available under the

1042 following NCBI Bioproject PRJNA174315 and PRJNA576639.

1043



1044 **Supplemental table 13.** Transcript levels for gel-derived proteins from the *Belgica antarctica* gene set.  
1045 Expression values are in transcripts per million. RNA-seq datasets are available under the following NCBI  
1046 Bioproject PRJNA174315 and PRJNA576639. Relative abundance of protein amounts were based on the  
1047 number of protein fragments that match a specific genes.

1048

1049 **Supplemental table 14.** Transcript levels for transcription factors from the *Belgica antarctica* gene set.  
1050 Expression values are in transcript per million. RNA-seq datasets are available under the following NCBI  
1051 Bioproject PRJNA174315 and PRJNA576639.

1052

1053 **Supplemental table 15-** Quantitative PCR primers used for the validation of RNA-seq result.

1054

1055

1056

1057

1058

1059

1060

1061

1062

1063

1064

1065

1066

1067

1068

1069 **REFERENCES**

- 1070 Abbott, K. C., & Dwyer, G. (2007). Food limitation and insect outbreaks: complex dynamics in plant-  
1071 herbivore models. *Journal of Animal Ecology*, 76(5), 1004-1014.
- 1072 Abraham, S., Lara-Pérez, L. A., Rodríguez, C., Contreras-Navarro, Y., Nuñez-Beverido, N., Ovruski, S., &  
1073 Pérez-Staples, D. (2016). The male ejaculate as inhibitor of female remating in two tephritid  
1074 flies. *Journal of Insect Physiology*, 88, 40-47.
- 1075 Afgan, E., Baker, D., Batut, B., Van Den Beek, M., Bouvier, D., Čech, M., . . . Grüning, B. A. (2018). The  
1076 Galaxy platform for accessible, reproducible and collaborative biomedical analyses: 2018  
1077 update. *Nucleic acids research*, 46(W1), W537-W544.
- 1078 Aguila, J. R., Hoshizaki, D. K., & Gibbs, A. G. (2013). Contribution of larval nutrition to adult reproduction  
1079 in *Drosophila melanogaster*. *Journal of Experimental Biology*, 216(3), 399-406.
- 1080 Aguila, J. R., Suszko, J., Gibbs, A. G., & Hoshizaki, D. K. (2007). The role of larval fat cells in adult  
1081 *Drosophila melanogaster*. *Journal of Experimental Biology*, 210(6), 956-963.
- 1082 Alfonso-Parra, C., Ahmed-Braimah, Y. H., Degner, E. C., Avila, F. W., Villarreal, S. M., Pleiss, J. A., . . .  
1083 Harrington, L. C. (2016). Mating-induced transcriptome changes in the reproductive tract of  
1084 female *Aedes aegypti*. *PLoS Neglected Tropical Diseases*, 10(2), e0004451.
- 1085 Attardo, G. M., Abd-Alla, A. M., Acosta-Serrano, A., Allen, J. E., Bateta, R., Benoit, J., . . . Christensen, M.  
1086 B. (2019). The Glossina genome cluster: comparative genomic analysis of the vectors of African  
1087 trypanosomes. *bioRxiv*, 531749.
- 1088 Attardo, G. M., Benoit, J. B., Michalkova, V., Patrick, K. R., Krause, T. B., & Aksoy, S. (2014). Ladybird late  
1089 homeodomain factor regulates lactation specific expression of milk proteins during pregnancy in  
1090 the tsetse fly (*Glossina morsitans*). *PLoS neglected tropical diseases*, 8, e2645.
- 1091 Avila, F. W., Sirot, L. K., LaFlamme, B. A., Rubinstein, C. D., & Wolfner, M. F. (2011). Insect seminal fluid  
1092 proteins: identification and function. *Annual review of entomology*, 56, 21-40.
- 1093 Baldini, F., Gabrieli, P., Rogers, D. W., & Catteruccia, F. (2012). Function and composition of male  
1094 accessory gland secretions in *Anopheles gambiae*: a comparison with other insect vectors of  
1095 infectious diseases. *Pathogens and global health*, 106(2), 82-93.
- 1096 Bastock, R., & St Johnston, D. (2008). *Drosophila* oogenesis. *Current Biology*, 18(23), R1082-R1087.
- 1097 Bauer, R., Löer, B., Ostrowski, K., Martini, J., Weimbs, A., Lechner, H., & Hoch, M. (2005). Intercellular  
1098 communication: the *Drosophila* innexin multiprotein family of gap junction proteins. *Chemistry  
1099 & biology*, 12(5), 515-526.
- 1100 Benoit, J., Kölliker, M., & Attardo, G. (2019). Putting invertebrate lactation in context. *Science (New York,  
1101 NY)*, 363(6427), 593-593.
- 1102 Benoit, J. B., Adelman, Z. N., Reinhardt, K., Dolan, A., Poelchau, M., Jennings, E. C., . . . Richards, S.  
1103 (2016). Unique features of a global human ectoparasite identified through sequencing of the  
1104 bed bug genome. *Nature Communications*, 7. doi:10.1038/ncomms10165
- 1105 Benoit, J. B., Attardo, G. M., Baumann, A. A., Michalkova, V., & Aksoy, S. (2015). Adenotrophic viviparity  
1106 in tsetse flies: potential for population control and as an insect model for lactation. *Annual  
1107 review of entomology, In press*
- 1108 Benoit, J. B., Lopez-Martinez, G., Elnitsky, M. A., Lee, R. E., & Denlinger, D. L. (2007). Moist habitats are  
1109 essential for adults of the Antarctic midge, *Belgica antarctica* (Diptera : Chironomidae), to avoid  
1110 dehydration. *European Journal of Entomology*, 104(1), 9-14.
- 1111 Benoit, J. B., Lopez-Martinez, G., Elnitsky, M. A., Lee, R. E., & Denlinger, D. L. (2009). Dehydration-  
1112 induced cross tolerance of *Belgica antarctica* larvae to cold and heat is facilitated by trehalose  
1113 accumulation. *Comparative Biochemistry and Physiology a-Molecular & Integrative Physiology*,  
1114 152(4), 518-523. doi:DOI 10.1016/j.cbpa.2008.12.009

- 1115 Benoit, J. B., Lopez-Martinez, G., Michaud, M. R., Elnitsky, M. A., Lee, R. E., Jr., & Denlinger, D. L. (2007).  
1116 Mechanisms to reduce dehydration stress in larvae of the Antarctic midge, *Belgica antarctica*.  
1117 *Journal Insect Physiol*, 53(7), 656-667. doi:10.1016/j.jinsphys.2007.04.006
- 1118 Benoit, J. B., Michalkova, V., Didion, E. M., Xiao, Y., Baumann, A. A., Attardo, G. M., & Aksoy, S. (2018).  
1119 Rapid autophagic regression of the milk gland during involution is critical for maximizing tsetse  
1120 viviparous reproductive output. *PLoS neglected tropical diseases*, 12(1), e0006204.
- 1121 Brucker, R. M., Funkhouser, L. J., Setia, S., Pauly, R., & Bordenstein, S. R. (2012). Insect Innate Immunity  
1122 Database (IIID): an annotation tool for identifying immune genes in insect genomes. *PLoS One*,  
1123 7(9), e45125.
- 1124 Burmester, T. (1999). Evolution and function of the insect hexamerins. *European Journal of Entomology*,  
1125 96, 213-226.
- 1126 Burmester, T., Massey Jr, H. C., Zakharkin, S. O., & Benes, H. (1998). The evolution of hexamerins and the  
1127 phylogeny of insects. *Journal of Molecular Evolution*, 47(1), 93-108.
- 1128 Cao, X., & Jiang, H. (2017). An analysis of 67 RNA-seq datasets from various tissues at different stages of  
1129 a model insect, *Manduca sexta*. *BMC genomics*, 18(1), 796.
- 1130 Clark, A. G., Eisen, M. B., Smith, D. R., Bergman, C. M., Oliver, B., Markow, T. A., . . . MacCallum, I. (2007).  
1131 Evolution of genes and genomes on the *Drosophila* phylogeny. *Nature*, 450(7167), 203-218.  
1132 doi:nature06341 [pii]10.1038/nature06341
- 1133 Clark, N., & Ma'ayan, A. (2011). Introduction to statistical methods for analyzing large data sets: Gene  
1134 Set Enrichment Analysis (GSEA). *Science Signaling*, 4(190), tr4.
- 1135 Conesa, A., Gotz, S., Garcia-Gomez, J. M., Terol, J., Talon, M., & Robles, M. (2005). Blast2GO: a universal  
1136 tool for annotation, visualization and analysis in functional genomics research. *Bioinformatics*,  
1137 21(18), 3674-3676. doi:10.1093/bioinformatics/bti610
- 1138 Convey, P. (1992). Aspects of the biology of the midge, *Eretmoptera murphyi* Schaeffer (Diptera:  
1139 Chironomidae), introduced to Signy Island, maritime Antarctic. *Polar Biology*, 12(6-7), 653-657.
- 1140 Convey, P. (1997). How are the life history strategies of Antarctic terrestrial invertebrates influenced by  
1141 extreme environmental conditions? *Journal of Thermal Biology*, 22(6), 429-440.
- 1142 Convey, P., & Block, W. (1996). Antarctic Diptera: ecology, physiology and distribution. *European Journal*  
1143 *of Entomology*, 93, 1-14.
- 1144 De Gregorio, E., Spellman, P. T., Rubin, G. M., & Lemaitre, B. (2001). Genome-wide analysis of the  
1145 *Drosophila* immune response by using oligonucleotide microarrays. *Proceedings of the National*  
1146 *Academy of Sciences*, 98(22), 12590-12595.
- 1147 De Keuckelaere, E., Hulpiau, P., Saeys, Y., Berx, G., & Van Roy, F. (2018). Nanos genes and their role in  
1148 development and beyond. *Cellular and Molecular Life Sciences*, 75(11), 1929-1946.
- 1149 Degrugillier, M. E. (1985). In vitro release of house fly, *Musca domestica* L. (Diptera: Muscidae),  
1150 acrosomal material after treatments with secretion of female accessory gland and micropyle cap  
1151 substance. *International Journal of Insect Morphology and Embryology*, 14(6), 381-391.
- 1152 DeLuca, S. Z., & O'Farrell, P. H. (2012). Barriers to male transmission of mitochondrial DNA in sperm  
1153 development. *Developmental cell*, 22(3), 660-668.
- 1154 Denis, B., Claisse, G., Le Rouzic, A., Wicker-Thomas, C., Lepennetier, G., & Joly, D. (2017). Male accessory  
1155 gland proteins affect differentially female sexual receptivity and remating in closely related  
1156 *Drosophila* species. *Journal of Insect Physiology*, 99, 67-77.
- 1157 Denlinger, D. L., & Ma, W.-C. (1974). Dynamics of the pregnancy cycle in the tsetse *Glossina morsitans*  
1158 *Journal of insect physiology*, 20, 1015-1026.
- 1159 Dixon, S. M., Coyne, J. A., & Noor, M. A. (2003). The evolution of conspecific sperm precedence in  
1160 *Drosophila*. *Molecular Ecology*, 12(5), 1179-1184.

- 1161 Dottorini, T., Nicolaidis, L., Ranson, H., Rogers, D. W., Crisanti, A., & Catteruccia, F. (2007). A genome-  
1162 wide analysis in *Anopheles gambiae* mosquitoes reveals 46 male accessory gland genes, possible  
1163 modulators of female behavior. *Proceedings of the National Academy of Sciences*, *104*(41),  
1164 16215-16220.
- 1165 Doyen, C. M., Chalkley, G. E., Voets, O., Bezstarosti, K., Demmers, J. A., Moshkin, Y. M., & Verrijzer, C. P.  
1166 (2015). A testis-specific chaperone and the chromatin remodeler ISWI mediate repackaging of  
1167 the paternal genome. *Cell reports*, *13*(7), 1310-1318.
- 1168 Dunning, L. T., Dennis, A. B., Park, D., Sinclair, B. J., Newcomb, R. D., & Buckley, T. R. (2013).  
1169 Identification of cold-responsive genes in a New Zealand alpine stick insect using RNA-Seq.  
1170 *Comparative Biochemistry and Physiology Part D: Genomics and Proteomics*, *8*(1), 24-31.  
1171 doi:10.1016/j.cbd.2012.10.005
- 1172 Eddy, S. R. (2009). A new generation of homology search tools based on probabilistic inference. *Genome*  
1173 *Informatics 2009: Genome Informatics Series*, *23*, 205-211.
- 1174 J. Edwards, J. S., & Baust, J. (1981). Sex ratio and adult behaviour of the Antarctic midge *Belgica*  
1175 *antarctica* (Diptera, Chironomidae). *Ecological Entomology*, *6*(3), 239-243.
- 1176 Gabrieli, P., Kakani, E. G., Mitchell, S. N., Mameli, E., Want, E. J., Anton, A. M., . . . Catteruccia, F. (2014).  
1177 Sexual transfer of the steroid hormone 20E induces the postmating switch in *Anopheles*  
1178 *gambiae*. *Proceedings of the National Academy of Sciences*, *111*(46), 16353-16358.
- 1179 Giglioli, M., & Mason, G. (1966). *The mating plug in anopheline mosquitoes*. Paper presented at the  
1180 Proceedings of the Royal Entomological Society of London. Series A, General Entomology.
- 1181 Gilmore, T. D. (2006). Introduction to NF-κB: players, pathways, perspectives. *Oncogene*, *25*(51), 6680.
- 1182 Goecks, J., Nekrutenko, A., & Taylor, J. (2010). Galaxy: a comprehensive approach for supporting  
1183 accessible, reproducible, and transparent computational research in the life sciences. *Genome*  
1184 *Biology*, *11*(8), R86.
- 1185 Grabherr, M. G., Haas, B. J., Yassour, M., Levin, J. Z., Thompson, D. A., Amit, I., . . . Regev, A. (2011). Full-  
1186 length transcriptome assembly from RNA-Seq data without a reference genome. *Nature*  
1187 *biotechnology*, *29*(7), 644-652. doi:nbt.1883 [pii]10.1038/nbt.1883
- 1188 Graveley, B. R., Brooks, A. N., Carlson, J. W., Duff, M. O., Landolin, J. M., Yang, L., . . . Booth, B. W. (2011).  
1189 The developmental transcriptome of *Drosophila melanogaster*. *Nature*, *471*(7339), 473-479.
- 1190 Güiza, J., Barria, I., Saez, J. C., & Vega, J. L. (2018). Innexins: Expression, Regulation and Functions.  
1191 *Frontiers in physiology*, *9*, 1414.
- 1192 Gusev, O., Suetsugu, Y., Cornette, R., Kawashima, T., Logacheva, M. D., Kondrashov, A. S., . . . Shimura, S.  
1193 (2014). Comparative genome sequencing reveals genomic signature of extreme desiccation  
1194 tolerance in the anhydrobiotic midge. *Nature Communication*, *5*, 4784.
- 1195 Gwynne, D. T. (2012). Male mating effort, confidence of paternity, and insect sperm competition. *Sperm*  
1196 *competition and the evolution of animal mating systems*, 117.
- 1197 Hagan, R. W., Didion, E. M., Rosselot, A. E., Holmes, C. J., Siler, S. C., Rosendale, A. J., . . . Nine, G. A.  
1198 (2018). Dehydration prompts increased activity and blood feeding by mosquitoes. *Scientific*  
1199 *reports*, *8*(1), 6804.
- 1200 Hahn, S., & Reinhardt, K. (2006). Habitat preference and reproductive traits in the Antarctic midge  
1201 *Parochlus steinenii* (Diptera: Chironomidae). *Antarctic Science*, *18*(2), 175-181.
- 1202 Harada, E., Lee, R. E., Denlinger, D. L., & Goto, S. G. (2014). Life history traits of adults and embryos of  
1203 the Antarctic midge *Belgica antarctica*. *Polar Biology*, *37*(8), 1213-1217.
- 1204 Heaven, M. R., Funk, A. J., Cobbs, A. L., Haffey, W. D., Norris, J. L., McCullumsmith, R. E., & Greis, K. D.  
1205 (2016). Systematic evaluation of data-independent acquisition for sensitive and reproducible  
1206 proteomics—a prototype design for a single injection assay. *Journal of Mass Spectrometry*,  
1207 *51*(1), 1-11.

- 1208 Hopkins, B. R., Sepil, I., Thézénas, M.-L., Craig, J. F., Miller, T., Charles, P. D., . . . Pizzari, T. (2019).  
1209 Divergent allocation of sperm and the seminal proteome along a competition gradient in  
1210 *Drosophila melanogaster*. *Proceedings of the National Academy of Sciences*, *116*(36), 17925-  
1211 17933.
- 1212 Hopkins, B. R., Sepil, I., & Wigby, S. (2017). Seminal fluid. *Current Biology*, *27*(11), R404-R405.
- 1213 Huang da, W., Sherman, B. T., Zheng, X., Yang, J., Imamichi, T., Stephens, R., & Lempicki, R. A. (2009).  
1214 Extracting biological meaning from large gene lists with DAVID. *Current Protocols in*  
1215 *Bioinformatics*, *Chapter 13*. doi:10.1002/0471250953.bi1311s27
- 1216 Initiative, I. G. G. (2014). Genome sequence of the tsetse fly (*Glossina morsitans*): vector of African  
1217 trypanosomiasis. *Science*, *25*(6182), 380-386.
- 1218 Irving, P., Troxler, L., Heuer, T. S., Belvin, M., Kopczynski, C., Reichhart, J. M., . . . Hetru, C. (2001). A  
1219 genome-wide analysis of immune responses in *Drosophila*. *Proceedings of the National Academy*  
1220 *of Sciences of the United States of America*, *98*(26), 15119-15124. doi:10.1073/pnas.261573998
- 1221 Izquierdo, A., Fahrenberger, M., Persampieri, T., Benedict, M. Q., Giles, T., Catteruccia, F., . . . Dottorini,  
1222 T. (2019). Evolution of gene expression levels in the male reproductive organs of *Anopheles*  
1223 mosquitoes. *Life science alliance*, *2*(1), e201800191.
- 1224 Kaiser, T. S., Poehn, B., Szkiba, D., Preussner, M., Sedlazeck, F. J., Zrim, A., . . . Hummel, T. (2016). The  
1225 genomic basis of circadian and circalunar timing adaptations in a midge. *Nature*, *540*(7631), 69.
- 1226 Kaiwa, N., Hosokawa, T., Nikoh, N., Tanahashi, M., Moriyama, M., Meng, X.-Y., . . . Ito, M. (2014).  
1227 Symbiont-supplemented maternal investment underpinning host's ecological adaptation.  
1228 *Current Biology*, *24*(20), 2465-2470.
- 1229 Kaulenas, M. (1992). Structure and function of the female accessory reproductive systems. In *Insect*  
1230 *Accessory Reproductive Structures* (pp. 33-121): Springer.
- 1231 Kaulenas, M. (2012). *Insect accessory reproductive structures: function, structure, and development* (Vol.  
1232 31): Springer Science & Business Media.
- 1233 Keeley, L. (1978). Endocrine regulation of fat body development and function. *Annual Review of*  
1234 *Entomology*, *23*(1), 329-352.
- 1235 Kelley, J. L., Peyton, J. T., Fiston-Lavier, A.-S., Teets, N. M., Yee, M.-C., Johnston, J. S., . . . Denlinger, D. L.  
1236 (2014). Compact genome of the Antarctic midge is likely an adaptation to an extreme  
1237 environment. *Nature Communications*, *5*, 4611.
- 1238 Kennedy, A. D. (1993). Water as a limiting factor in the Antarctic terrestrial environment: a  
1239 biogeographical synthesis. *Arctic and Alpine Research*, *25*(4), 308-315.
- 1240 Kim, S., Oh, M., Jung, W., Park, J., Choi, H.-G., & Shin, S. C. (2017). Genome sequencing of the winged  
1241 midge, *Parochlus steinenii*, from the Antarctic Peninsula. *GigaScience*, *6*(3), giw009.
- 1242 Kim, T., & Kim, Y. (2005). Overview of innate immunity in *Drosophila*. *Journal of biochemistry and*  
1243 *molecular biology*, *38*(2), 121.
- 1244 Kotrba, M. (1996). Sperm transfer by spermatophore in Diptera: new results from the Diopsidae.  
1245 *Zoological Journal of the Linnean Society*, *117*(3), 305-323.
- 1246 Langfelder, P., & Horvath, S. (2008). WGCNA: an R package for weighted correlation network analysis.  
1247 *BMC bioinformatics*, *9*(1), 559.
- 1248 Larsen, W. J. (1976). Cell remodeling in the fat body of an insect. *Tissue and Cell*, *8*(1), 73-92.
- 1249 Lee, K. P., Simpson, S. J., Clissold, F. J., Brooks, R., Ballard, J. W. O., Taylor, P. W., . . . Raubenheimer, D.  
1250 (2008). Lifespan and reproduction in *Drosophila*: new insights from nutritional geometry.  
1251 *Proceedings of the National Academy of Sciences*, *105*(7), 2498-2503.
- 1252 Lee, S.-M., Lee, S.-B., Park, C.-H., & Choi, J. (2006). Expression of heat shock protein and hemoglobin  
1253 genes in *Chironomus tentans* (Diptera, chironomidae) larvae exposed to various environmental  
1254 pollutants: a potential biomarker of freshwater monitoring. *Chemosphere*, *65*(6), 1074-1081.

- 1255 Lefebvre, F. A., & Lécuyer, É. (2018). Flying the RNA nest: *Drosophila* reveals novel insights into the  
1256 transcriptome dynamics of early development. *Journal of developmental biology*, 6(1), 5.
- 1257 Lefkovitch, L. (1965). The study of population growth in organisms grouped by stages. *Biometrics*, 1-18.
- 1258 Leopold, R. A., & Degrugillier, M. E. (1973). Sperm penetration of housefly eggs: evidence for  
1259 involvement of a female accessory secretion. *Science*, 181(4099), 555-557.
- 1260 Lococo, D., & Huebner, E. (1980). The ultrastructure of the female accessory gland, the cement gland, in  
1261 the insect *Rhodnius prolixus*. *Tissue and Cell*, 12(3), 557-580.
- 1262 Lopez-Martinez, G., Benoit, J. B., Rinehart, J. P., Elnitsky, M. A., Lee, R. E., & Denlinger, D. L. (2009).  
1263 Dehydration, rehydration, and overhydration alter patterns of gene expression in the Antarctic  
1264 midge, *Belgica antarctica*. *Journal of Comparative Physiology B-Biochemical Systemic and  
1265 Environmental Physiology*, 179(4), 481-491. doi:DOI 10.1007/s00360-008-0334-0
- 1266 Lopez-Martinez, G., Elnitsky, M. A., Benoit, J. B., Lee, R. E., Jr., & Denlinger, D. L. (2008). High resistance  
1267 to oxidative damage in the Antarctic midge *Belgica antarctica*, and developmentally linked  
1268 expression of genes encoding superoxide dismutase, catalase and heat shock proteins. *Insect  
1269 Biochem Mol Biol*, 38(8), 796-804. doi:10.1016/j.ibmb.2008.05.006
- 1270 Loppin, B., Dubruille, R., & Horard, B. (2015). The intimate genetics of *Drosophila* fertilization. *Open  
1271 biology*, 5(8), 150076.
- 1272 Love, M. I., Huber, W., & Anders, S. (2014). Moderated estimation of fold change and dispersion for  
1273 RNA-seq data with DESeq2. *Genome Biol*, 15(12), 550.
- 1274 Lung, O., Kuo, L., & Wolfner, M. F. (2001). *Drosophila* males transfer antibacterial proteins from their  
1275 accessory gland and ejaculatory duct to their mates. *Journal of Insect Physiology*, 47(6), 617-622.
- 1276 Lung, O., & Wolfner, M. F. (2001). Identification and characterization of the major *Drosophila  
1277 melanogaster* mating plug protein. *Insect biochemistry and molecular biology*, 31(6-7), 543-551.
- 1278 Lv, D. K., Bai, X., Li, Y., Ding, X. D., Ge, Y., Cai, H., . . . Zhu, Y. M. (2010). Profiling of cold-stress-responsive  
1279 miRNAs in rice by microarrays. *Gene*, 459(1-2), 39-47. doi:DOI 10.1016/j.gene.2010.03.011
- 1280 Ma, W. C., Denlinger, D. L., Jarlfors, U., & Smith, D. S. (1975). Structural modulations in the tsetse fly milk  
1281 gland during a pregnancy cycle. *Tissue Cell*, 7(2), 319-330. doi:0040-8166(75)90008-7 [pii]
- 1282 Malik, A., Khan, K. M., Asif, M., Arsalan, H. M., Zahid, S., Manan, A., & Rasool, M. (2016). Development of  
1283 Resistance Mechanism in Mosquitoes: Cytochrome P450, the Ultimate Detoxifier. *Journal of  
1284 Applied and Emerging Sciences*, 4(2), pp100-117.
- 1285 Marchini, D., Bernini, L. F., Marri, L., Giordano, P. C., & Dallai, R. (1991). The female reproductive  
1286 accessory glands of the medfly *Ceratitis capitata*: antibacterial activity of the secretion fluid.  
1287 *Insect Biochemistry*, 21(6), 597-605.
- 1288 Masci, V. L., Di Luca, M., Gambellini, G., Taddei, A. R., Belardinelli, M. C., Guerra, L., . . . Fausto, A. M.  
1289 (2015). Reproductive biology in Anophelinae mosquitoes (Diptera, Culicidae): fine structure of  
1290 the female accessory gland. *Arthropod structure & development*, 44(4), 378-387.
- 1291 McGraw, L. A., Clark, A. G., & Wolfner, M. F. (2008). Post-mating gene expression profiles of female  
1292 *Drosophila melanogaster* in response to time and to four male accessory gland proteins.  
1293 *Genetics*, 179(3), 1395-1408. doi:10.1534/genetics.108.086934
- 1294 McKenna, D. D., Scully, E. D., Pauchet, Y., Hoover, K., Kirsch, R., Geib, S. M., . . . Arsalan, D. (2016).  
1295 Genome of the Asian longhorned beetle (*Anoplophora glabripennis*), a globally significant  
1296 invasive species, reveals key functional and evolutionary innovations at the beetle–plant  
1297 interface. *Genome biology*, 17(1), 227.
- 1298 Meier, R., Kotrba, M., & Ferrar, P. (1999). Ovoviviparity and viviparity in the Diptera. *Biological Reviews  
1299 of the Cambridge Philosophical Society*, 74(3), 199-258.
- 1300 Michaud, M. R., Benoit, J. B., Lopez-Martinez, G., Elnitsky, M. A., Lee, R. E., & Denlinger, D. L. (2008).  
1301 Metabolomics reveals unique and shared metabolic changes in response to heat shock, freezing

- 1302 and desiccation in the Antarctic midge, *Belgica antarctica*. *Journal of insect physiology*, 54(4),  
1303 645-655. doi:DOI 10.1016/j.jinsphys.2008.01.003
- 1304 Mitchell, S. N., Kakani, E. G., South, A., Howell, P. I., Waterhouse, R. M., & Catteruccia, F. (2015).  
1305 Evolution of sexual traits influencing vectorial capacity in anopheline mosquitoes. *Science*,  
1306 347(6225), 985-988.
- 1307 Newfeld, S. J., Chartoff, E. H., Graff, J. M., Melton, D. A., & Gelbart, W. M. (1996). Mothers against dpp  
1308 encodes a conserved cytoplasmic protein required in DPP/TGF-beta responsive cells.  
1309 *Development*, 122(7), 2099-2108.
- 1310 Olafson, P. U., Aksoy, S., Attardo, G. M., Buckmeier, G., Chen, X., Coates, C. J., . . . Friedrich, M. (2019).  
1311 Functional genomics of the stable fly, *Stomoxys calcitrans*, reveals mechanisms underlying  
1312 reproduction, host interactions, and novel targets for pest control. *bioRxiv*, 623009.
- 1313 Orr-Weaver, T. L. (2015). When bigger is better: the role of polyploidy in organogenesis. *Trends in*  
1314 *Genetics*, 31(6), 307-315.
- 1315 Otti, O., McTighe, A. P., & Reinhardt, K. (2013). In vitro antimicrobial sperm protection by an ejaculate-  
1316 like substance. *Functional Ecology*, 27(1), 219-226.
- 1317 Otti, O., Naylor, R. A., Siva-Jothy, M. T., & Reinhardt, K. (2009). Bacteriolytic activity in the ejaculate of an  
1318 insect. *American Naturalist*, 174(2), 292-295. doi:Doi 10.1086/600099
- 1319 Palmer, W. J., & Jiggins, F. M. (2015). Comparative genomics reveals the origins and diversity of  
1320 arthropod immune systems. *Molecular biology and evolution*, 32(8), 2111-2129.
- 1321 Panfilio, K. A., Jentzsch, I. M. V., Benoit, J. B., Ereyilmaz, D., Suzuki, Y., Colella, S., . . . Ioannidis, P.  
1322 (2019). Molecular evolutionary trends and feeding ecology diversification in the Hemiptera,  
1323 anchored by the milkweed bug genome. *Genome Biology*, 20(1), 64.
- 1324 Papa, F., Windbichler, N., Waterhouse, R. M., Cagnetti, A., D'Amato, R., Persampieri, T., . . . Papatianos,  
1325 P. A. (2017). Rapid evolution of female-biased genes among four species of *Anopheles* malaria  
1326 mosquitoes. *Genome research*, 27(9), 1536-1548.
- 1327 Parisi, M., Nuttall, R., Edwards, P., Minor, J., Naiman, D., Lu, J., . . . Oliver, B. (2004). A survey of ovary-,  
1328 testis-, and soma-biased gene expression in *Drosophila melanogaster* adults. *Genome Biology*,  
1329 5(6), R40. doi:10.1186/gb-2004-5-6-r40
- 1330 Pauchet, Y., Wilkinson, P., Vogel, H., Nelson, D., Reynolds, S., Heckel, D. G., & Ffrench-Constant, R.  
1331 (2010). Pyrosequencing the *Manduca sexta* larval midgut transcriptome: messages for digestion,  
1332 detoxification and defence. *Insect molecular biology*, 19(1), 61-75.
- 1333 Perry, J. C., Harrison, P. W., & Mank, J. E. (2014). The ontogeny and evolution of sex-biased gene  
1334 expression in *Drosophila melanogaster*. *Molecular biology and evolution*, 31(5), 1206-1219.
- 1335 Poiani, A. (2006). Complexity of seminal fluid: a review. *Behavioral Ecology and Sociobiology*, 60(3), 289-  
1336 310.
- 1337 Polak, M., Simmons, L. W., Benoit, J. B., Ruohonen, K., Simpson, S. J., & Solon-Biet, S. M. (2017).  
1338 Nutritional geometry of paternal effects on embryo mortality. *Proceedings of the Royal Society*  
1339 *B: Biological Sciences*, 284(1864), 20171492.
- 1340 Price, C. S. (1997). Conspecific sperm precedence in *Drosophila*. *Nature*, 388(6643), 663.
- 1341 Qazi, M. C. B., Heifetz, Y., & Wolfner, M. F. (2003). The developments between gametogenesis and  
1342 fertilization: ovulation and female sperm storage in *Drosophila melanogaster*. *Dev Biol*, 256(2),  
1343 195-211.
- 1344 Quinlan, M. E. (2016). Cytoplasmic streaming in the *Drosophila* oocyte. *Annual review of cell and*  
1345 *developmental biology*, 32, 173-195.
- 1346 Ramalho-Santos, J., Varum, S., Amaral, S., Mota, P. C., Sousa, A. P., & Amaral, A. (2009). Mitochondrial  
1347 functionality in reproduction: from gonads and gametes to embryos and embryonic stem cells.  
1348 *Human reproduction update*, 15(5), 553-572.

- 1349 Rato, L., Alves, M. G., Socorro, S., Duarte, A. I., Cavaco, J. E., & Oliveira, P. F. (2012). Metabolic regulation  
1350 is important for spermatogenesis. *Nature Reviews Urology*, 9(6), 330.
- 1351 Raudvere, U., Kolberg, L., Kuzmin, I., Arak, T., Adler, P., Peterson, H., & Vilo, J. (2019). g: Profiler: a web  
1352 server for functional enrichment analysis and conversions of gene lists (2019 update). *Nucleic  
1353 acids research*.
- 1354 Ravi Ram, K., & Wolfner, M. F. (2007). Seminal influences: *Drosophila* Acps and the molecular interplay  
1355 between males and females during reproduction. *Integrative and comparative biology*, 47(3),  
1356 427-445.
- 1357 Rial, D., Santos-Echeandía, J., Álvarez-Salgado, X. A., Jordi, A., Tovar-Sánchez, A., & Bellas, J. (2016).  
1358 Toxicity of seabird guano to sea urchin embryos and interaction with Cu and Pb. *Chemosphere*,  
1359 145, 384-393.
- 1360 Richard, M., & Hoch, M. (2015). *Drosophila* eye size is determined by innexin 2-dependent  
1361 decapentaplegic signalling. *Developmental Biology*, 408(1), 26-40.
- 1362 Rinehart, J. P., Hayward, S. A. L., Elnitsky, M. A., Sandro, L. H., Lee, R. E., & Denlinger, D. L. (2006).  
1363 Continuous up-regulation of heat shock proteins in larvae, but not adults, of a polar insect.  
1364 *Proceedings of the National Academy of Sciences of the United States of America*, 103(38),  
1365 14223-14227. doi:DOI 10.1073/pnas.0606840103
- 1366 Rogers, D. W., Whitten, M. M., Thailayil, J., Soichot, J., Levashina, E. A., & Catteruccia, F. (2008).  
1367 Molecular and cellular components of the mating machinery in *Anopheles gambiae* females.  
1368 *Proceedings of the National Academy of Sciences*, 105(49), 19390-19395.
- 1369 Ronges, D., Walsh, J. P., Sinclair, B. J., & Stillman, J. H. (2012). Changes in extreme cold tolerance,  
1370 membrane composition and cardiac transcriptome during the first day of thermal acclimation in  
1371 the porcelain crab *Petrolisthes cinctipes*. *Journal of Experimental Biology*, 215(Pt 11), 1824-1836.  
1372 doi:10.1242/jeb.069658
- 1373 Rosa, E., & Saastamoinen, M. (2017). Sex-dependent effects of larval food stress on adult performance  
1374 under semi-natural conditions: only a matter of size? *Oecologia*, 184(3), 633-642.
- 1375 Rosendale, A. J., Dunlevy, M. E., McCue, M. D., & Benoit, J. B. (2019). Progressive behavioural,  
1376 physiological and transcriptomic shifts over the course of prolonged starvation in ticks.  
1377 *Molecular Ecology*, 28(1), 49-65.
- 1378 Rosendale, A. J., Romick-Rosendale, L. E., Watanabe, M., Dunlevy, M. E., & Benoit, J. B. (2016).  
1379 Mechanistic underpinnings of dehydration stress in ticks revealed through RNA-seq and  
1380 metabolomics. *Journal of Experimental Biology, Submitted*. .
- 1381 Rosetto, M., Belardinelli, M., Fausto, A., Marchini, D., Bongiorno, G., Maroli, M., & Mazzini, M. (2003). A  
1382 mammalian-like lipase gene is expressed in the female reproductive accessory glands of the  
1383 sand fly *Phlebotomus papatasi* (Diptera, Psychodidae). *Insect molecular biology*, 12(5), 501-508.
- 1384 Sato, M., & Sato, K. (2011). Degradation of paternal mitochondria by fertilization-triggered autophagy in  
1385 *C. elegans* embryos. *Science*, 334(6059), 1141-1144.
- 1386 Scolari, F., Benoit, J. B., Michalkova, V., Aksoy, E., Takac, P., Abd-Alla, A. M., . . . Attardo, G. M. (2016).  
1387 The spermatophore in *Glossina morsitans morsitans*: insights into male montributions to  
1388 reproduction. *Scientific reports*, 6, 20334.
- 1389 Shim, J., Gururaja-Rao, S., & Banerjee, U. (2013). Nutritional regulation of stem and progenitor cells in  
1390 *Drosophila*. *Development*, 140(23), 4647-4656.
- 1391 Shutt, B., Stables, L., Aboagye-Antwi, F., Moran, J., & Tripet, F. (2010). Male accessory gland proteins  
1392 induce female monogamy in anopheline mosquitoes. *Medical and veterinary entomology*, 24(1),  
1393 91-94.



- 1394 Sibley, P. K., Ankley, G. T., & Benoit, D. A. (2001). Factors affecting reproduction and the importance of  
1395 adult size on reproductive output of the midge *Chironomus tentans*. *Environmental Toxicology*  
1396 *and Chemistry: An International Journal*, 20(6), 1296-1303.
- 1397 Silva, J. V., Yoon, S., Domingues, S., Guimarães, S., Goltsev, A. V., e Silva, E. F. d. C., . . . Fardilha, M.  
1398 (2015). Amyloid precursor protein interaction network in human testis: sentinel proteins for  
1399 male reproduction. *BMC bioinformatics*, 16(1), 12.
- 1400 Sirot, L. K., Wong, A., Chapman, T., & Wolfner, M. F. (2015). Sexual conflict and seminal fluid proteins: a  
1401 dynamic landscape of sexual interactions. *Cold Spring Harbor perspectives in biology*, 7(2),  
1402 a017533.
- 1403 Soller, M., Bownes, M., & Kubli, E. (1999). Control of oocyte maturation in sexually mature *Drosophila*  
1404 females. *Developmental biology*, 208(2), 337-351. doi:10.1006/dbio.1999.9210
- 1405 Sobic, D., & Olson, E. N. (2003). A new twist on twist: Modulation of the NF-KappaB pathway. *Cell Cycle*,  
1406 2(2), 75-77.
- 1407 Strong, J. (1967). Ecology of terrestrial arthropods at Palmer station, Antarctic Peninsula. *Entomology of*  
1408 *Antarctica*, 357-371.
- 1409 Stroumbakis, N. D., Li, Z., & Tolia, P. P. (1996). A homolog of human transcription factor NF-X1 encoded  
1410 by the *Drosophila* shuttle craft gene is required in the embryonic central nervous system.  
1411 *Molecular and cellular biology*, 16(1), 192-201.
- 1412 Sugg, P., Edwards, J. S., & Baust, J. (1983). Phenology and life history of *Belgica antarctica*, an Antarctic  
1413 midge (Diptera: Chironomidae). *Ecological Entomology*, 8(1), 105-113.
- 1414 Supek, F., Bošnjak, M., Škunca, N., & Šmuc, T. (2011). REVIGO summarizes and visualizes long lists of  
1415 gene ontology terms. *PLoS One*, 6(7), e21800.
- 1416 Swanson, W. J., Wong, A., Wolfner, M. F., & Aquadro, C. F. (2004). Evolutionary expressed sequence tag  
1417 analysis of *Drosophila* female reproductive tracts identifies genes subjected to positive  
1418 selection. *Genetics*, 168(3), 1457-1465.
- 1419 Swevers, L., Raikhel, A., Sappington, T., Shirk, P., & Iatrou, K. (2005). Vitellogenesis and post-vitellogenic  
1420 maturation of the insect ovarian follicle. In L.I. Gilbert, S. Gill, & K. Iatrou (Eds.), *Comprehensive*  
1421 *molecular insect science* (pp. 87-155). Elsevier, NY
- 1422 Teets, N. M., Elnitsky, M. A., Benoit, J. B., Lopez-Martinez, G., Denlinger, D. L., & Lee, R. E. (2008). Rapid  
1423 cold-hardening in larvae of the Antarctic midge *Belgica antarctica*: cellular cold-sensing and a  
1424 role for calcium. *American Journal of Physiology-Regulatory Integrative and Comparative*  
1425 *Physiology*, 294(6), R1938-R1946. doi:DOI 10.1152/ajpregu.00459.2007
- 1426 Teets, N. M., Kawarasaki, Y., Lee, R. E., Jr., & Denlinger, D. L. (2013). Expression of genes involved in  
1427 energy mobilization and osmoprotectant synthesis during thermal and dehydration stress in the  
1428 Antarctic midge, *Belgica antarctica*. *Journal of Comparative Physiology B*, 183(2), 189-201.  
1429 doi:10.1007/s00360-012-0707-2
- 1430 Teets, N. M., Peyton, J. T., Colinet, H., Renault, D., Kelley, J. L., Kawarasaki, Y., . . . Denlinger, D. L. (2012).  
1431 Gene expression changes governing extreme dehydration tolerance in an Antarctic insect.  
1432 *Proceedings of the National Academy of Sciences of the United States of America*, 109(50),  
1433 20744-20749. doi:10.1073/pnas.1218661109
- 1434 Telfer, W. H., & Kunkel, J. G. (1991). The function and evolution of insect storage hexamers. *Annual*  
1435 *Review of Entomology*, 36(1), 205-228.
- 1436 Terashima, J., & Bownes, M. (2005). A microarray analysis of genes involved in relating egg production  
1437 to nutritional intake in *Drosophila melanogaster*. *Cell Death Differ*, 12(5), 429.
- 1438 Thailayil, J., Magnusson, K., Godfray, H. C. J., Crisanti, A., & Catteruccia, F. (2011). Spermless males elicit  
1439 large-scale female responses to mating in the malaria mosquito *Anopheles gambiae*.  
1440 *Proceedings of the National Academy of Sciences*, 108(33), 13677-13681.

- 1441 Tian, C.-B., Wei, D., Xiao, L.-F., Dou, W., Liu, H., & Wang, J.-J. (2017). Comparative transcriptome analysis  
1442 of three *Bactrocera dorsalis* (Diptera: Tephritidae) organs to identify functional genes in the  
1443 male accessory glands and ejaculatory duct. *Florida Entomologist*, *100*(1), 42-51.
- 1444 Tian, E., & Hagen, K. G. T. (2007). O-linked glycan expression during *Drosophila* development.  
1445 *Glycobiology*, *17*(8), 820-827.
- 1446 Tirmarche, S., Kimura, S., Dubruielle, R., Horard, B., & Loppin, B. (2016). Unlocking sperm chromatin at  
1447 fertilization requires a dedicated egg thioredoxin in *Drosophila*. *Nature communications*, *7*,  
1448 13539.
- 1449 Tran, D. T., & Ten Hagen, K. G. (2013). Mucin-type O-glycosylation during development. *Journal of*  
1450 *Biological Chemistry*, *288*(10), 6921-6929.
- 1451 Tran, D. T., Zhang, L., Zhang, Y., Tian, E., Earl, L. A., & Ten Hagen, K. G. (2012). Multiple members of the  
1452 UDP-GalNAc: polypeptide N-acetylgalactosaminyltransferase family are essential for viability in  
1453 *Drosophila*. *Journal of Biological Chemistry*, *287*(8), 5243-5252.
- 1454 Turnier, J. L., Brunner, H. I., Bennett, M., Aleed, A., Gulati, G., Haffey, W. D., . . . Witte, D. (2018).  
1455 Discovery of SERPINA3 as a candidate urinary biomarker of lupus nephritis activity.  
1456 *Rheumatology*, *58*(2), 321-330.
- 1457 Usher, M. B., & Edwards, M. (1984). A dipteran from south of the Antarctic Circle: *Belgica antarctica*  
1458 (Chironomidae) with a description of its larva. *Biological Journal of the Linnean Society*, *23*(1),  
1459 19-31.
- 1460 Vanderperre, B., Cermakova, K., Escoffier, J., Kaba, M., Bender, T., Nef, S., & Martinou, J.-C. (2016).  
1461 MPC1-like is a placental mammal-specific mitochondrial pyruvate carrier subunit expressed in  
1462 postmeiotic male germ cells. *Journal of Biological Chemistry*, *291*(32), 16448-16461.
- 1463 Venancio, T., Cristofolletti, P., Ferreira, C., Verjovski-Almeida, S., & Terra, W. (2009). The *Aedes aegypti*  
1464 larval transcriptome: a comparative perspective with emphasis on trypsins and the domain  
1465 structure of peritrophins. *Insect molecular biology*, *18*(1), 33-44.
- 1466 Villarreal, S. M., Pitcher, S., Helinski, M. E., Johnson, L., Wolfner, M. F., & Harrington, L. C. (2018). Male  
1467 contributions during mating increase female survival in the disease vector mosquito *Aedes*  
1468 *aegypti*. *Journal of insect physiology*, *108*, 1-9.
- 1469 Vogt, C., Belz, D., Galluba, S., Nowak, C., Oetken, M., & Oehlmann, J. (2007). Effects of cadmium and  
1470 tributyltin on development and reproduction of the non-biting midge *Chironomus riparius*  
1471 (Diptera)—baseline experiments for future multi-generation studies. *Journal of Environmental*  
1472 *Science and Health Part A*, *42*(1), 1-9.
- 1473 Weirauch, M. T., & Hughes, T. (2011). A catalogue of eukaryotic transcription factor types, their  
1474 evolutionary origin, and species distribution. In *A handbook of transcription factors* (pp. 25-73):  
1475 Springer.
- 1476 Weirauch, M. T., Yang, A., Albu, M., Cote, A. G., Montenegro-Montero, A., Drewe, P., . . . Cook, K. (2014).  
1477 Determination and inference of eukaryotic transcription factor sequence specificity. *Cell*, *158*(6),  
1478 1431-1443.
- 1479 Wensler, R. J., & Rempel, J. (1962). The morphology of the male and female reproductive systems of the  
1480 midge, *Chironomus plumosus* L. *Canadian Journal of Zoology*, *40*(2), 199-229.
- 1481 Xie, T., & Spradling, A. C. (1998). Decapentaplegic is essential for the maintenance and division of  
1482 germline stem cells in the *Drosophila* ovary. *Cell*, *94*(2), 251-260.
- 1483 Zhang, J., Marshall, K. E., Westwood, J. T., Clark, M. S., & Sinclair, B. J. (2011). Divergent transcriptomic  
1484 responses to repeated and single cold exposures in *Drosophila melanogaster*. *Journal of*  
1485 *Experimental Biology*, *214*(Pt 23), 4021-4029. doi:10.1242/jeb.059535

1486 Zhang, L., Zhang, Y., & Ten Hagen, K. G. (2008). A mucin-type O-glycosyltransferase modulates cell  
1487 adhesion during *Drosophila* development. *Journal of Biological Chemistry*, 283(49), 34076-  
1488 34086.

1489

1490

1491

Figure 1

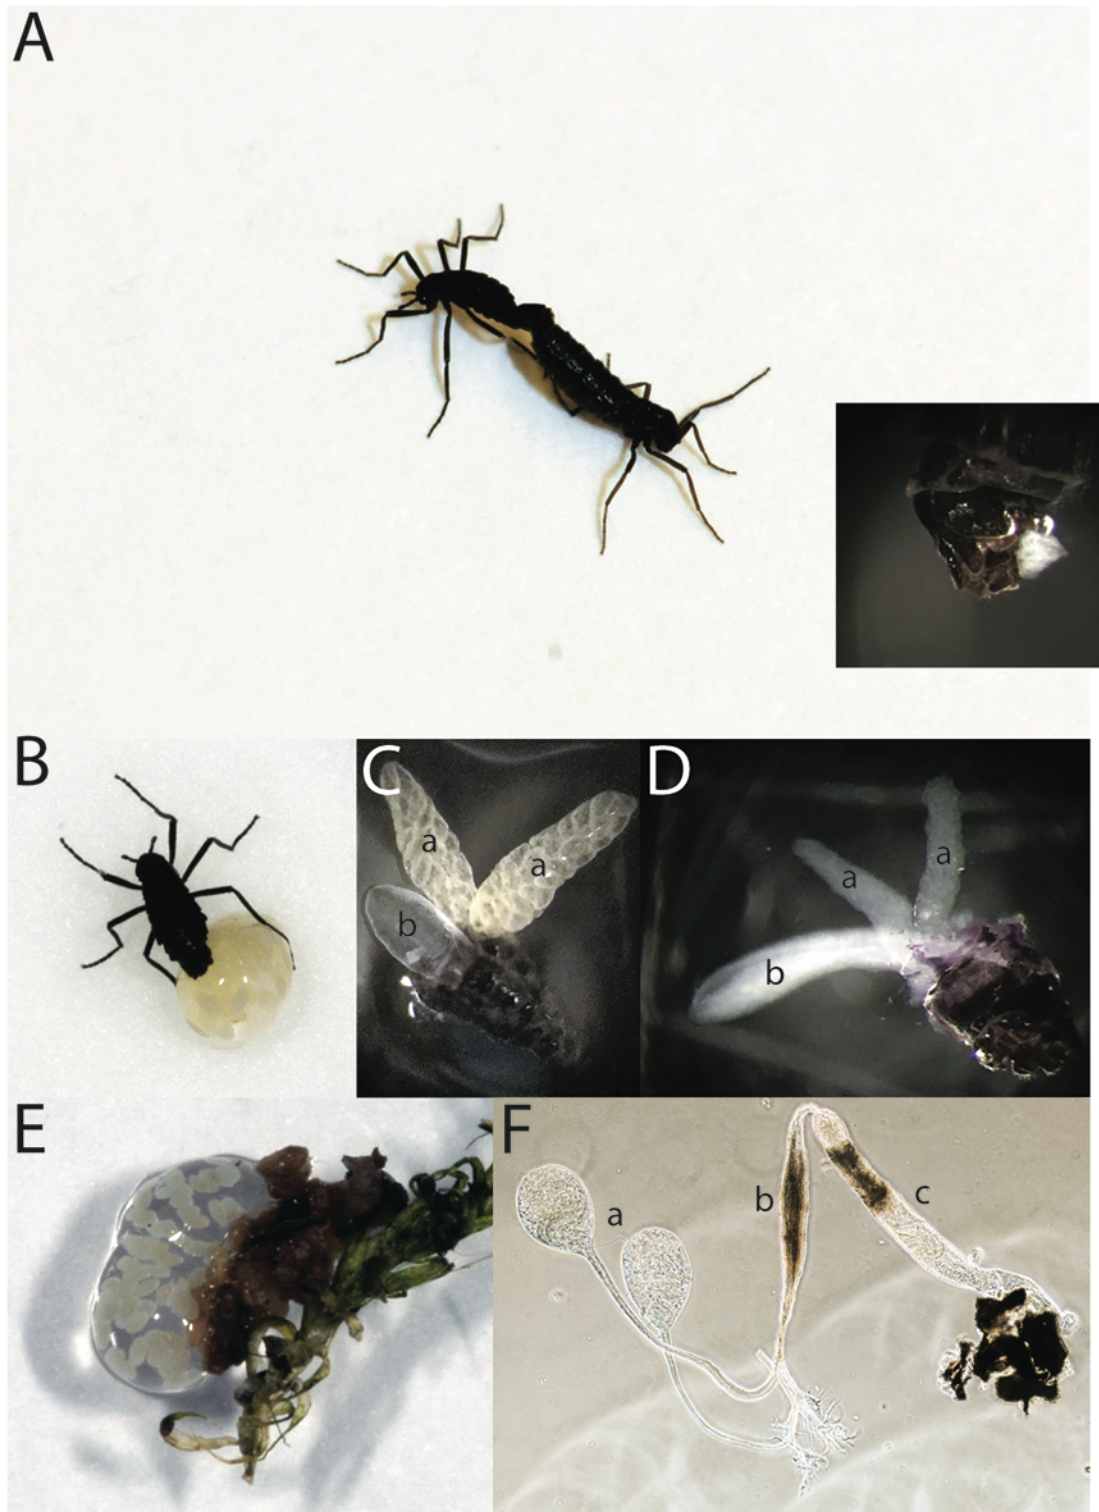

Figure 2

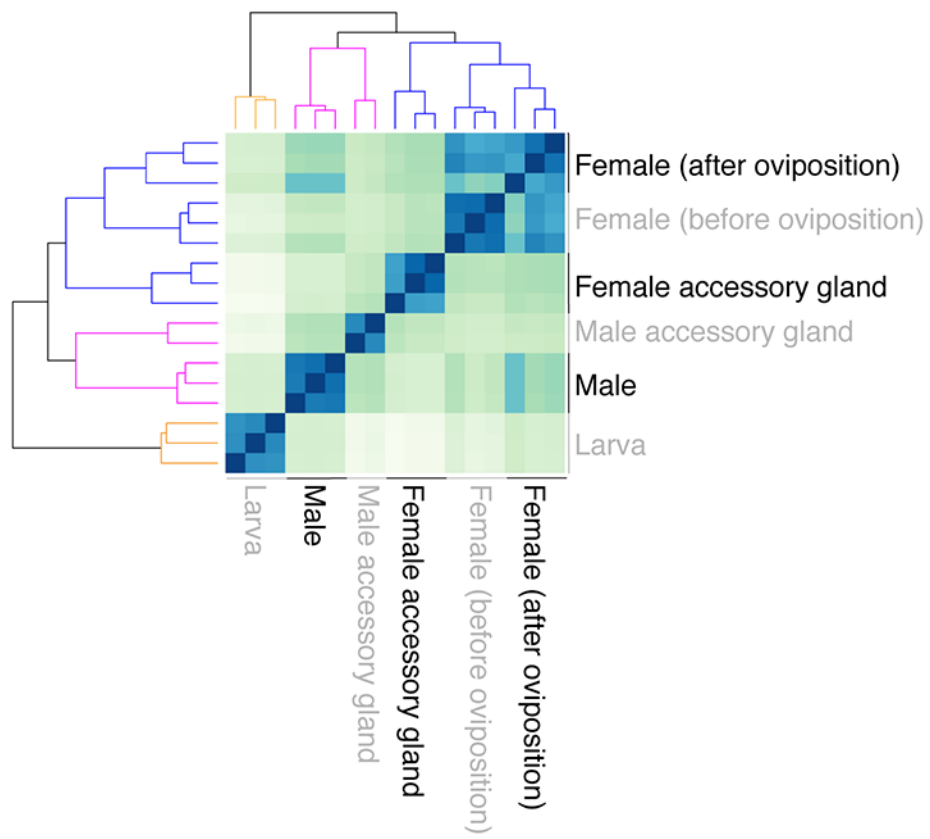

# Figure 3

**A.**

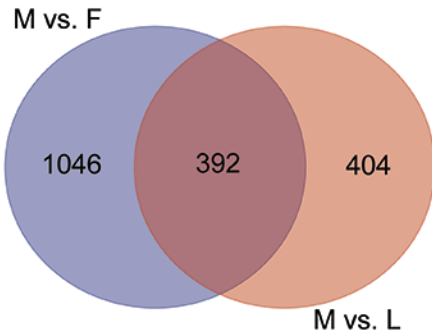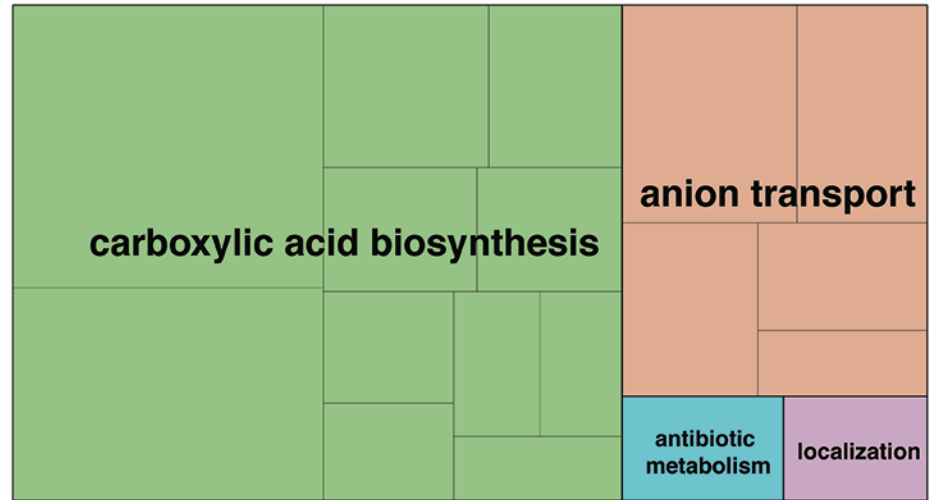

**B.**

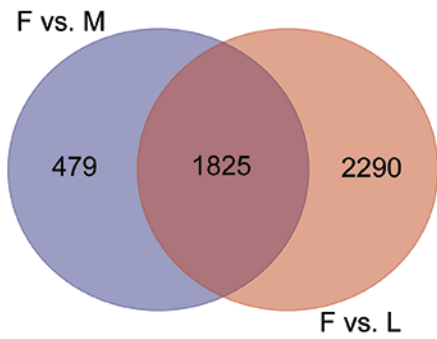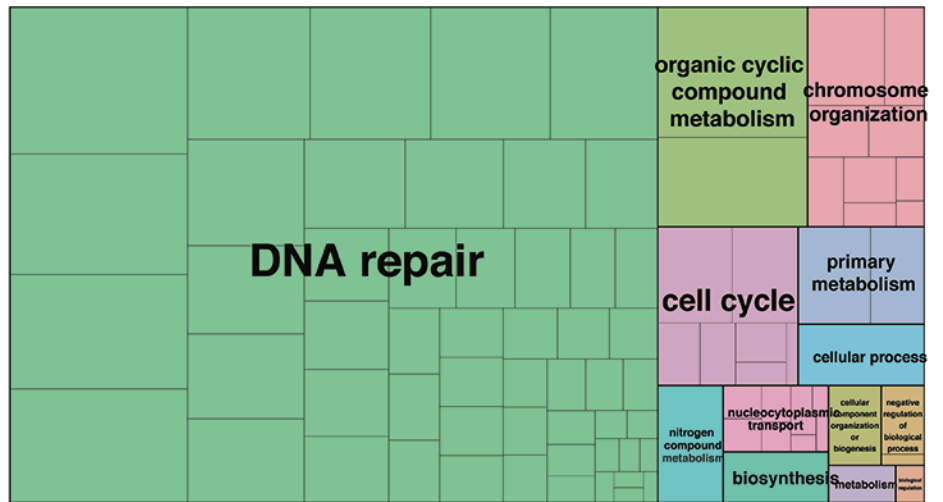

**C.**

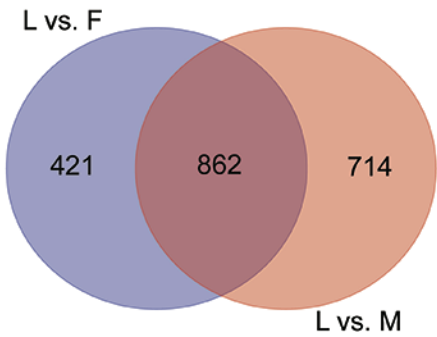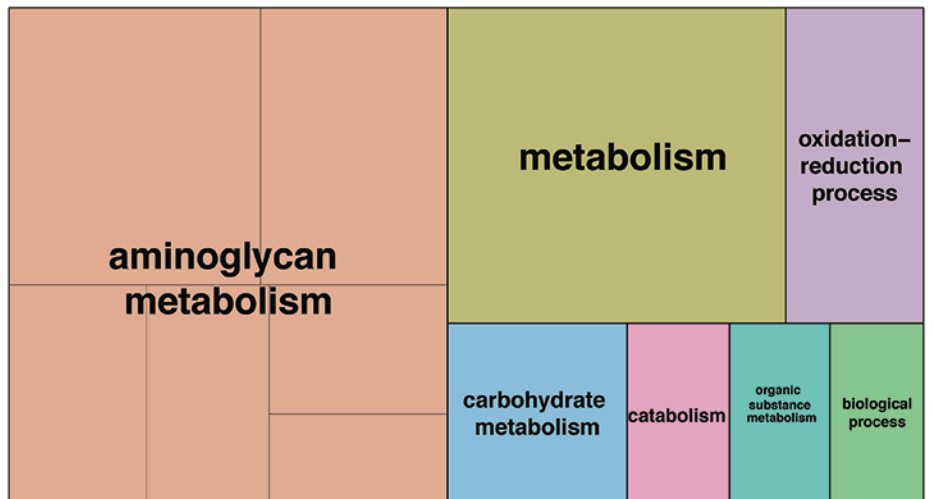

**A.**

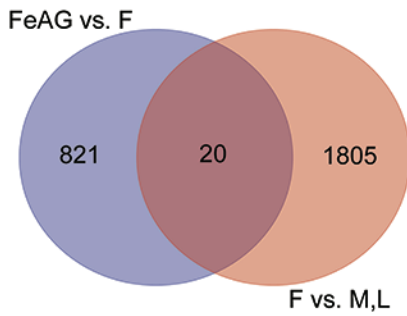

**B.**

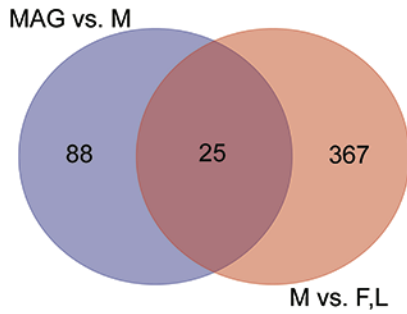

**Figure 4**

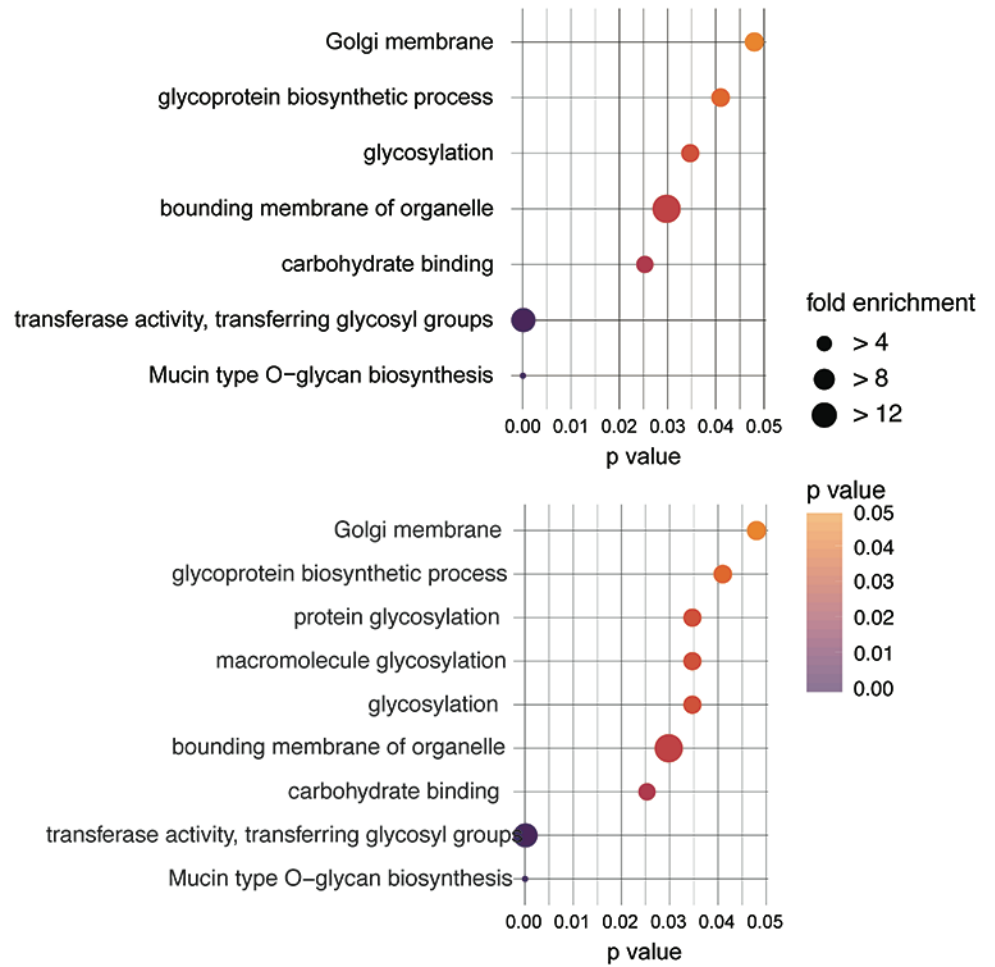

## Figure 5

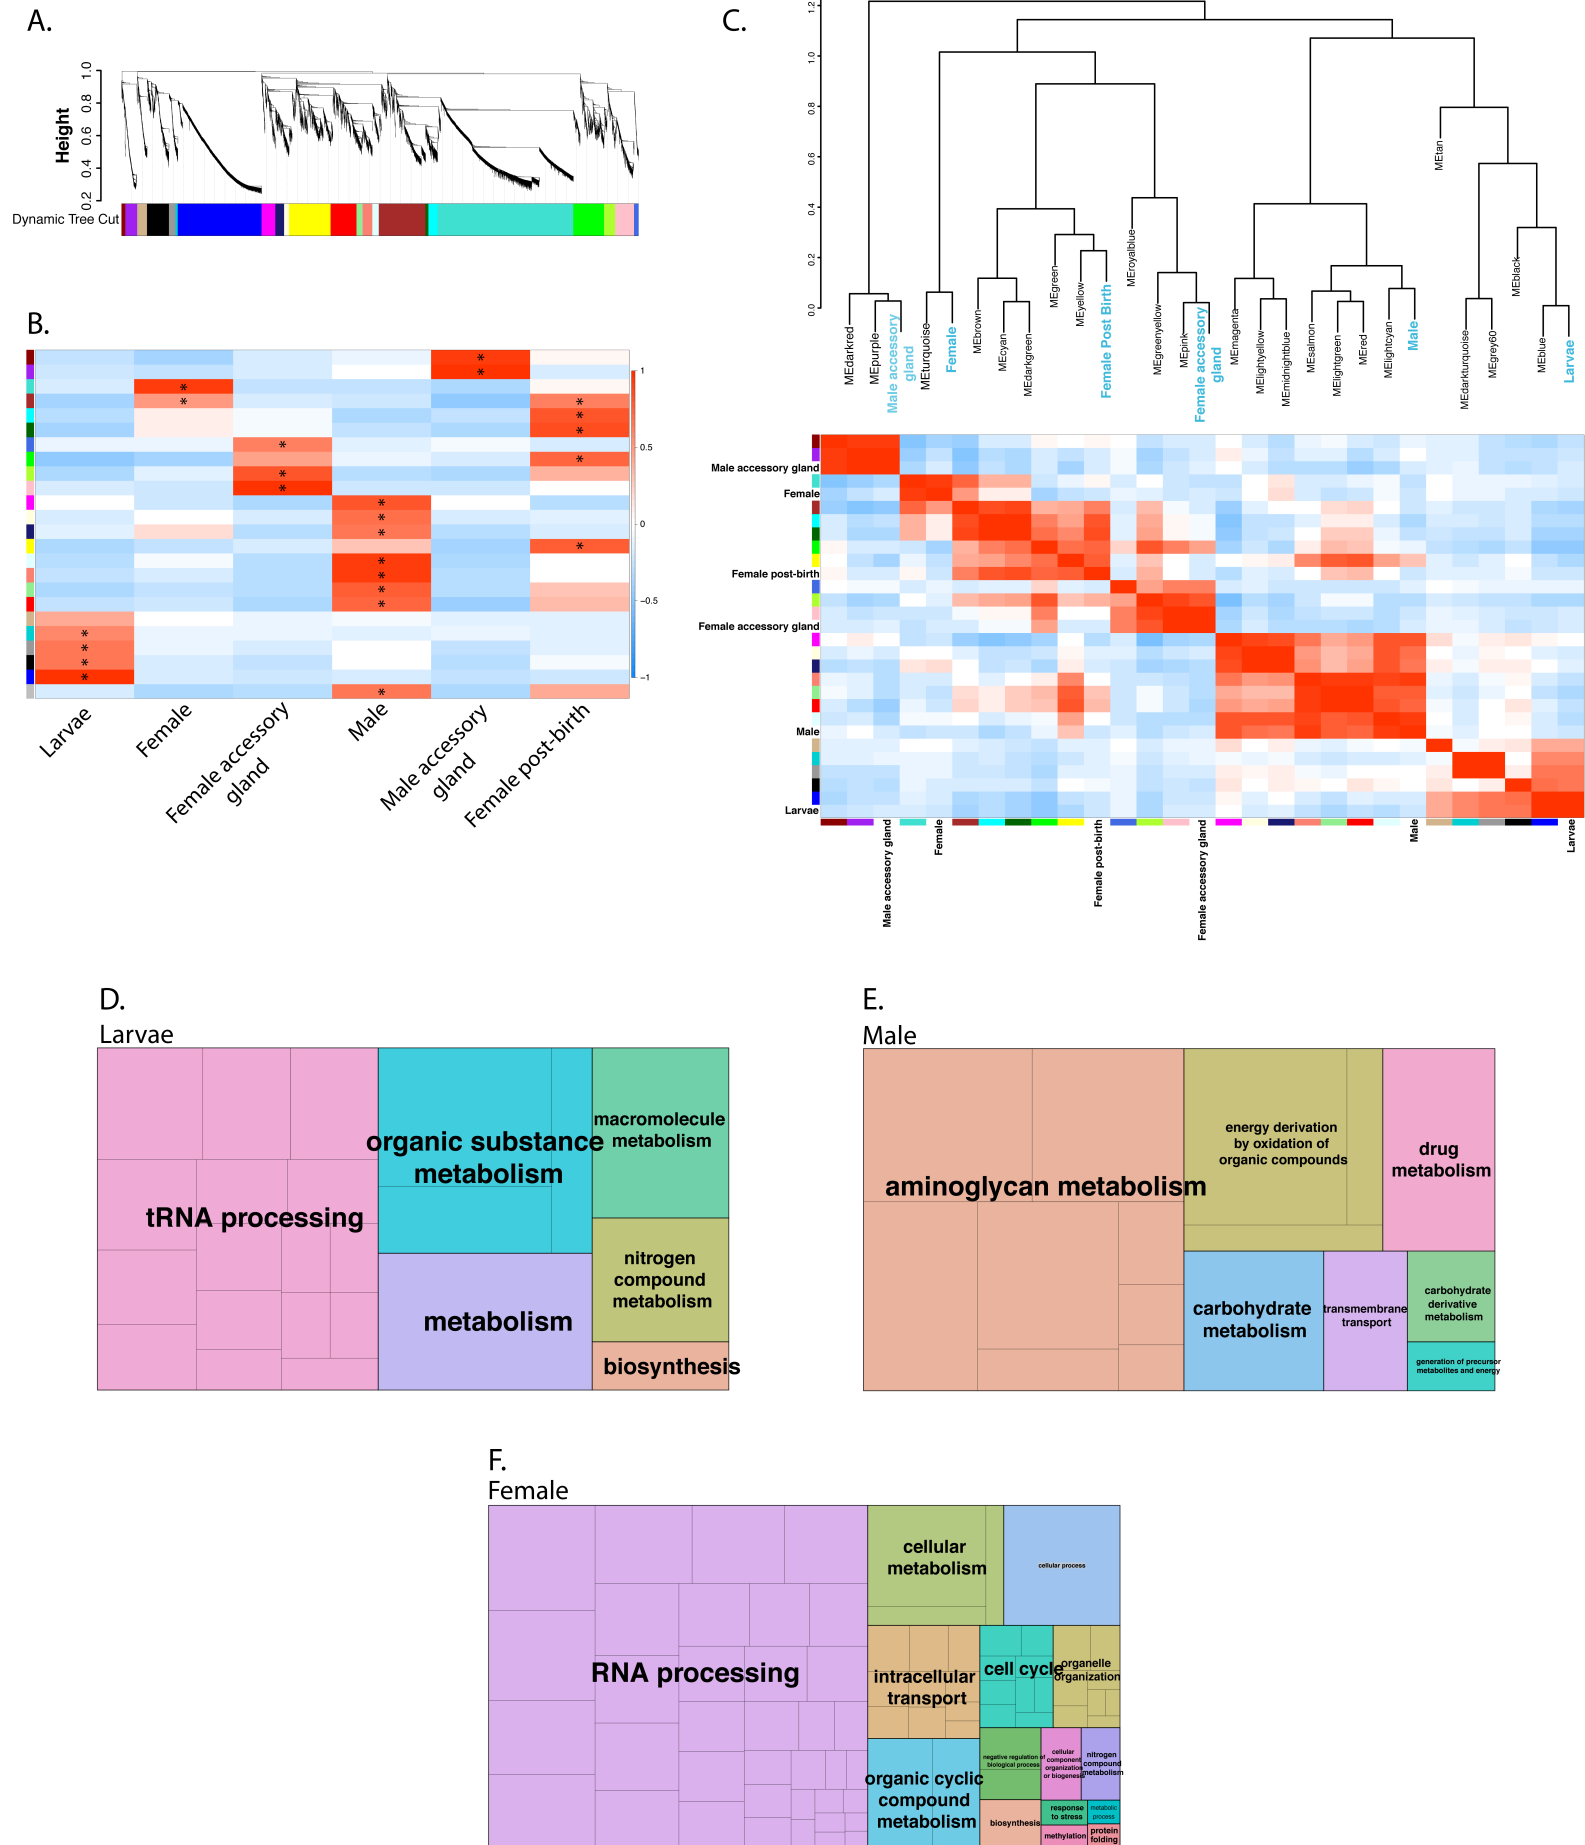



## Figure 6

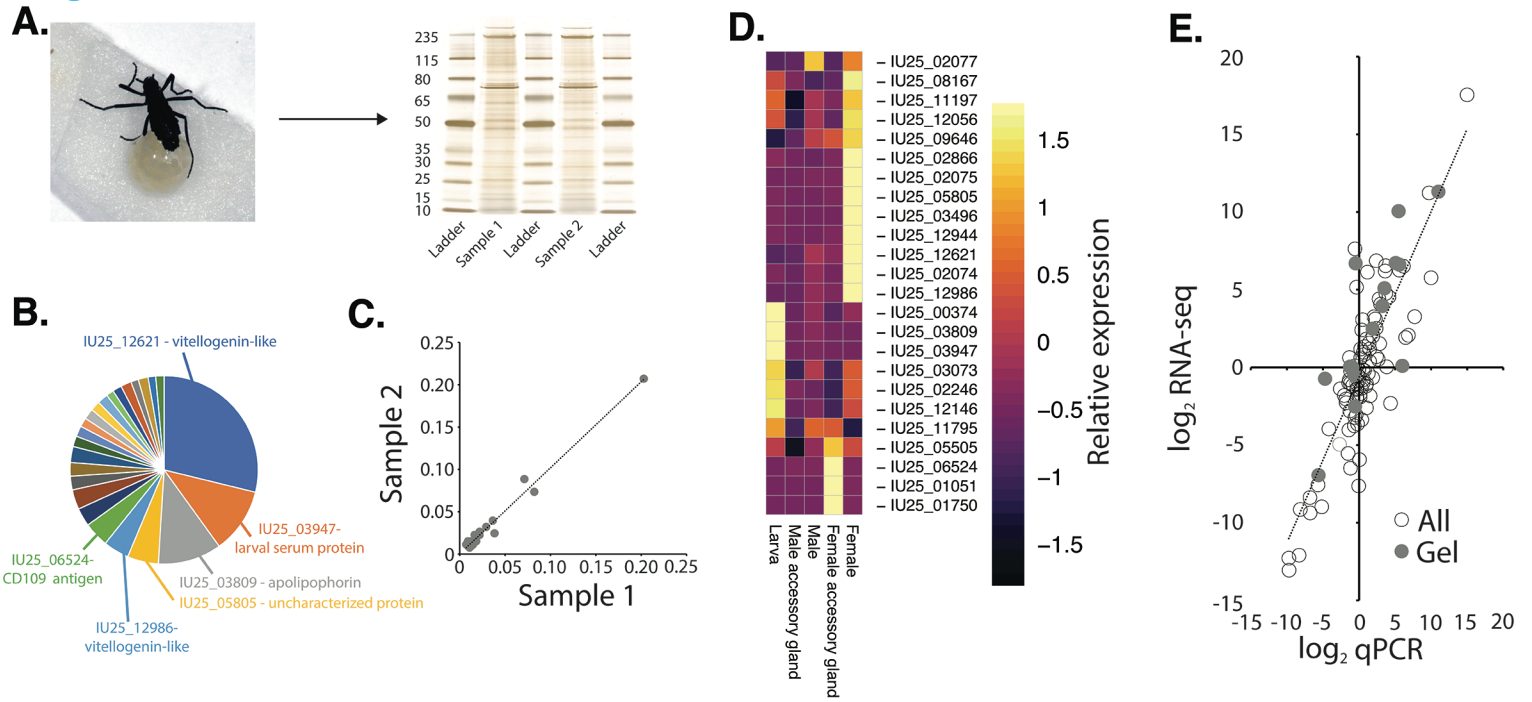



Figure 8

**A. Female**

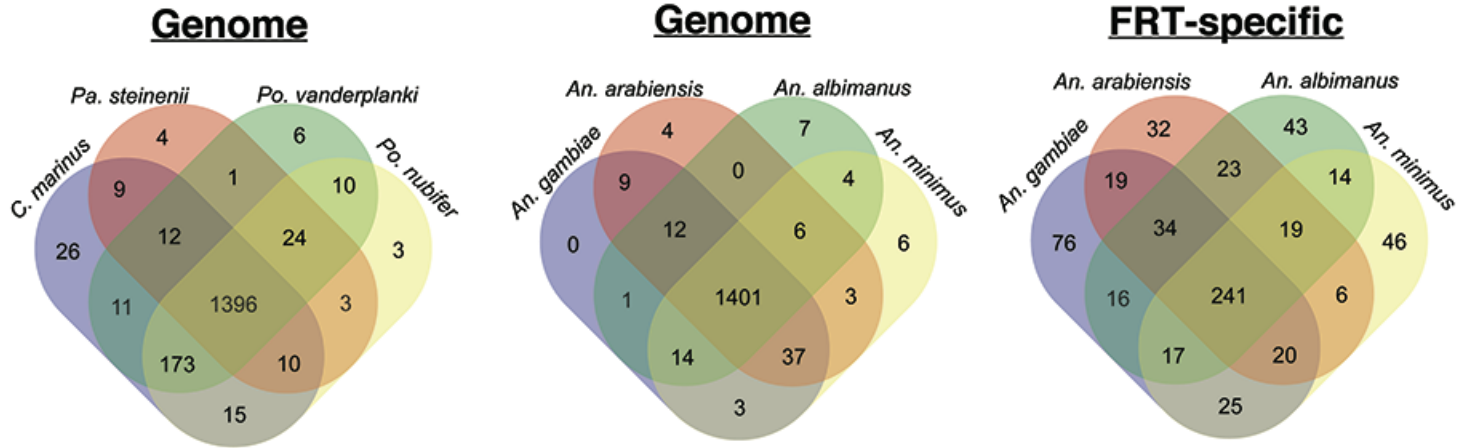

**B. Male**

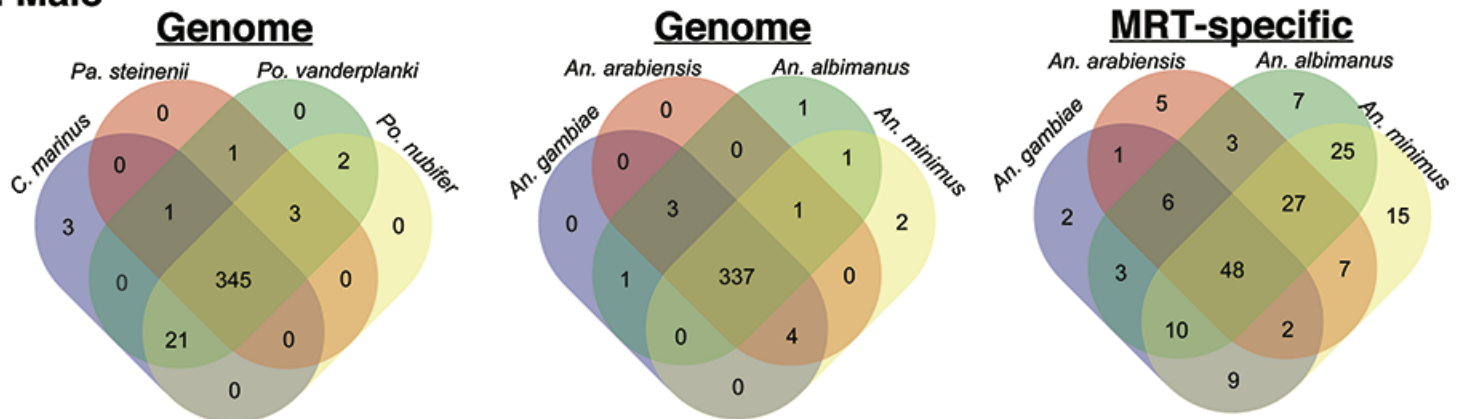

**C. Larvae**

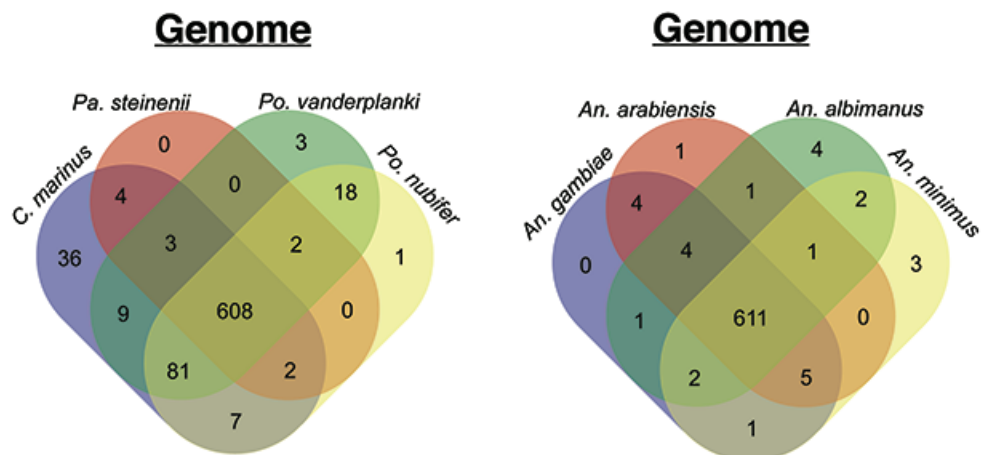

Figure 9

**A. Female accessory gland**

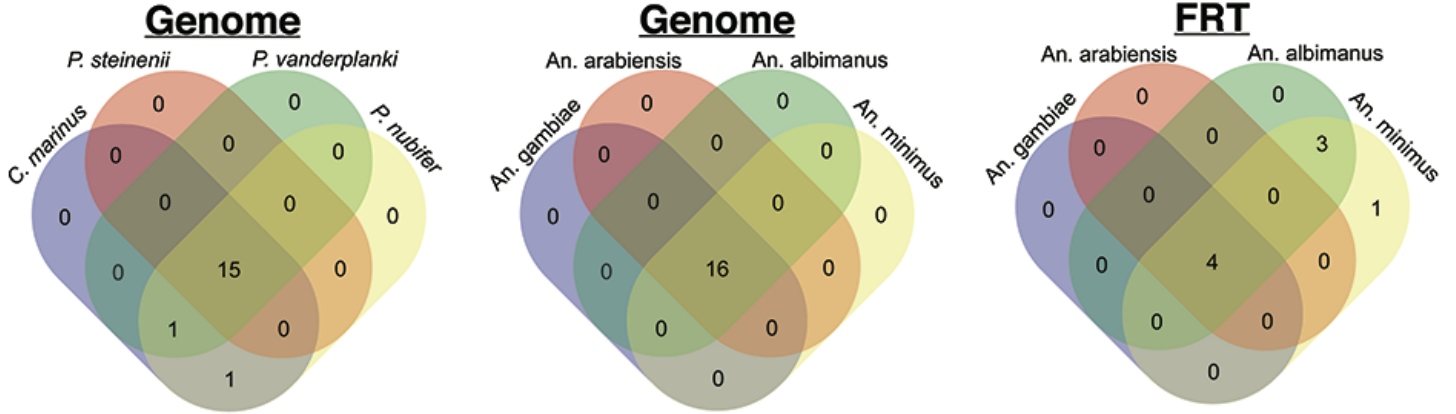

**B. Male accessory glands**

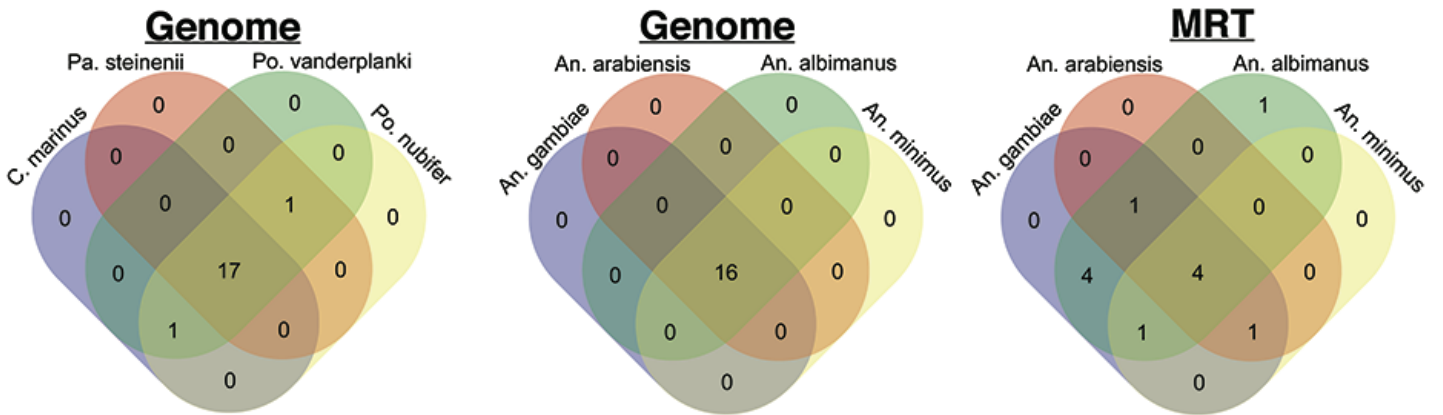

**C. Male accessory glands enriched genes of mosquitoes**

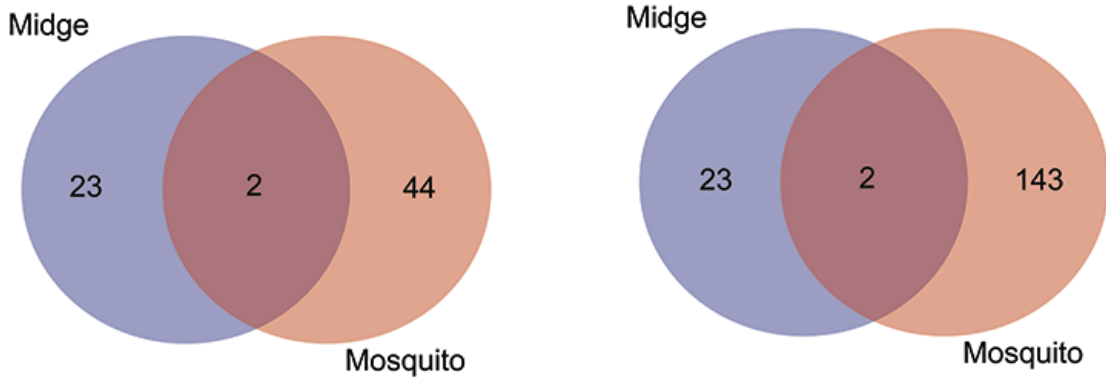

Figure 10

**A.**

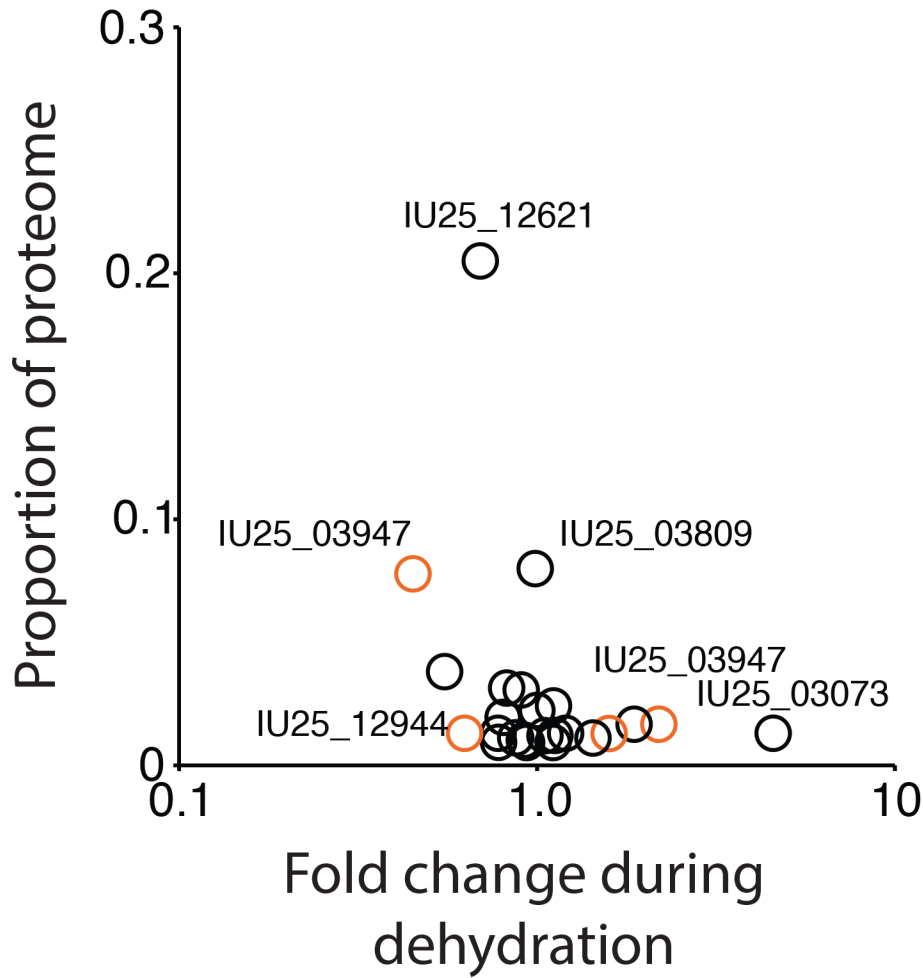

**B.**

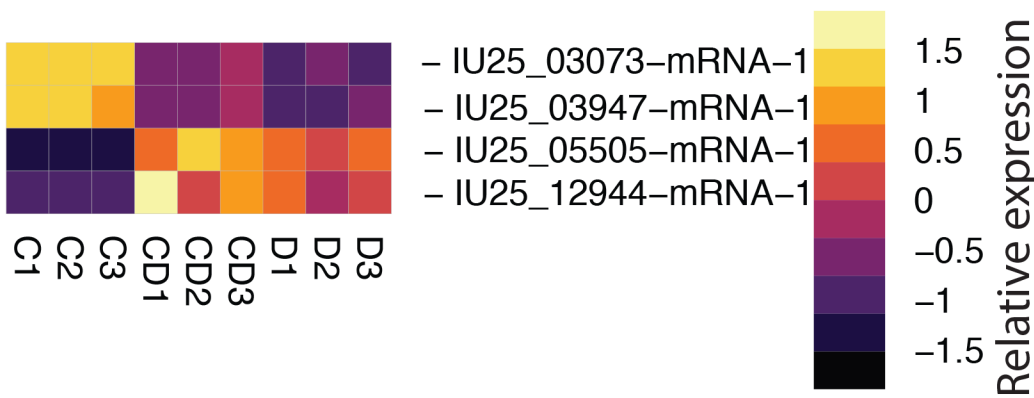

**C.**

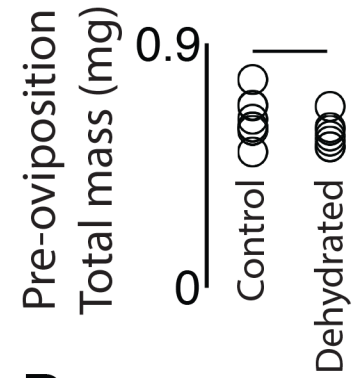

**D.**

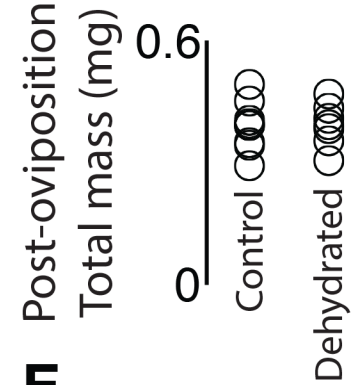

**E.**

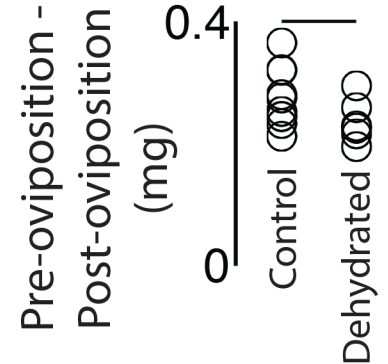

**F.**

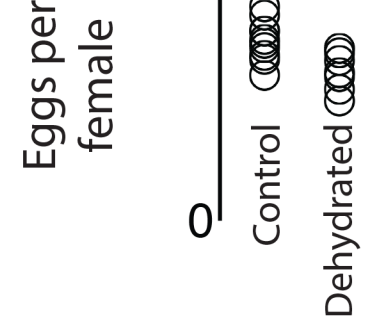

Figure 11

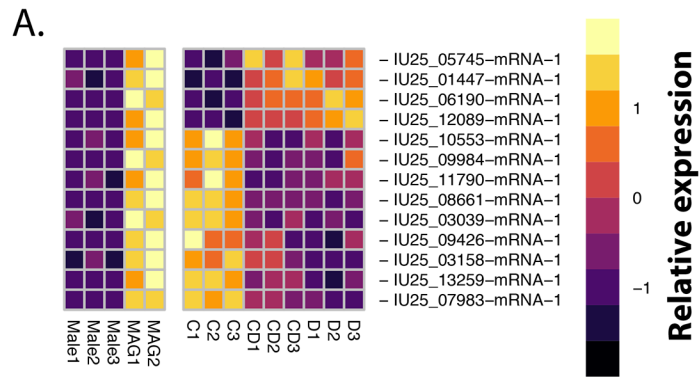

B.

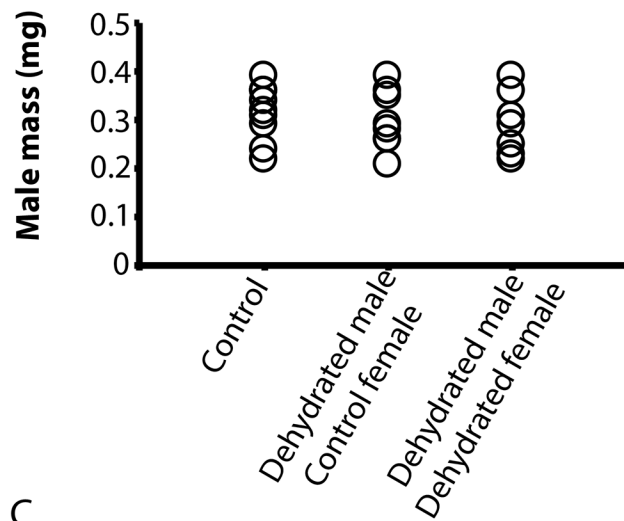

C.

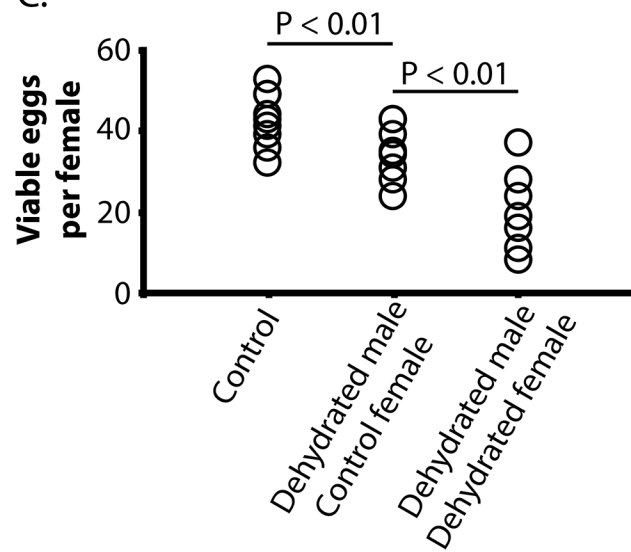

# Figure 12

A.

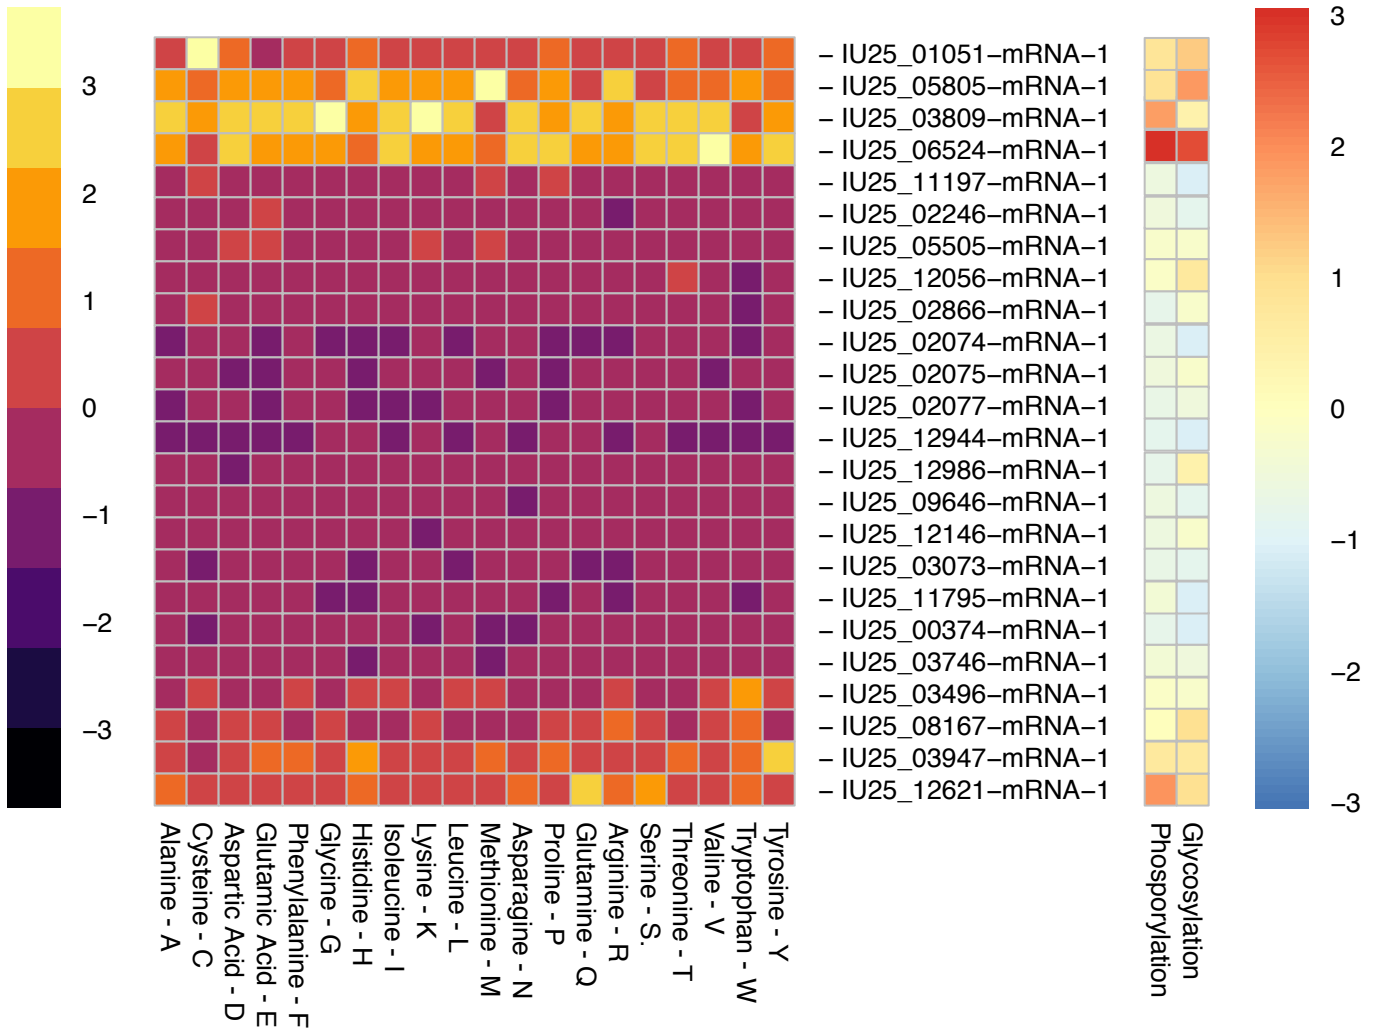

B.

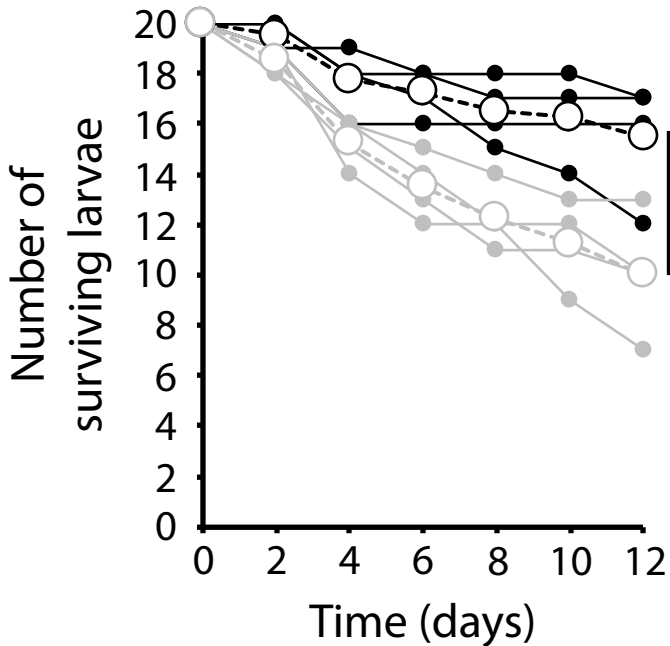

C.

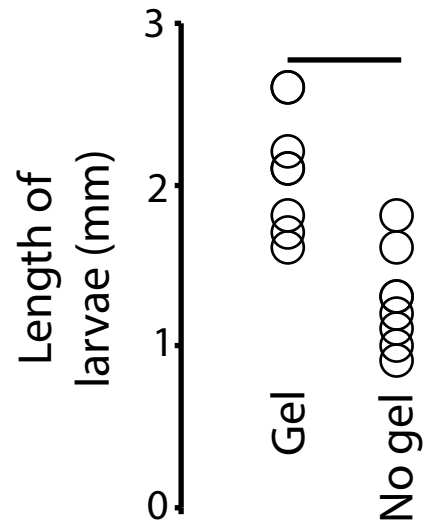

## Figure 13

### A. Daily thermal changes

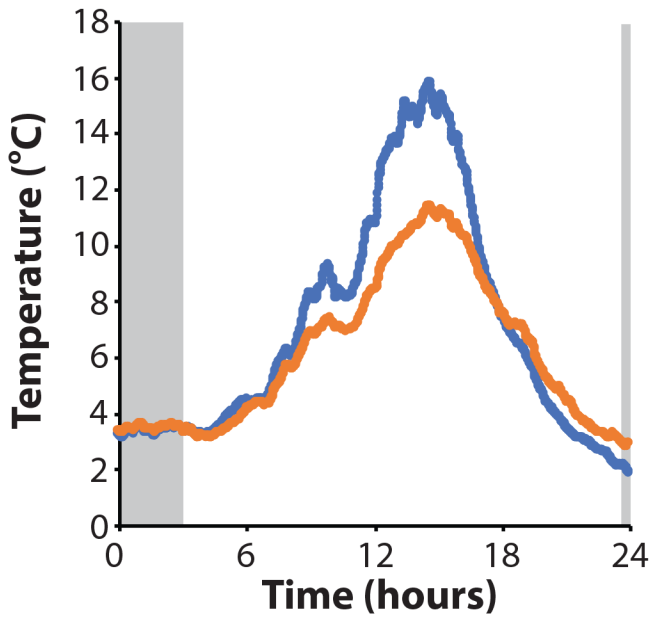

### B. Exposure to 20°C

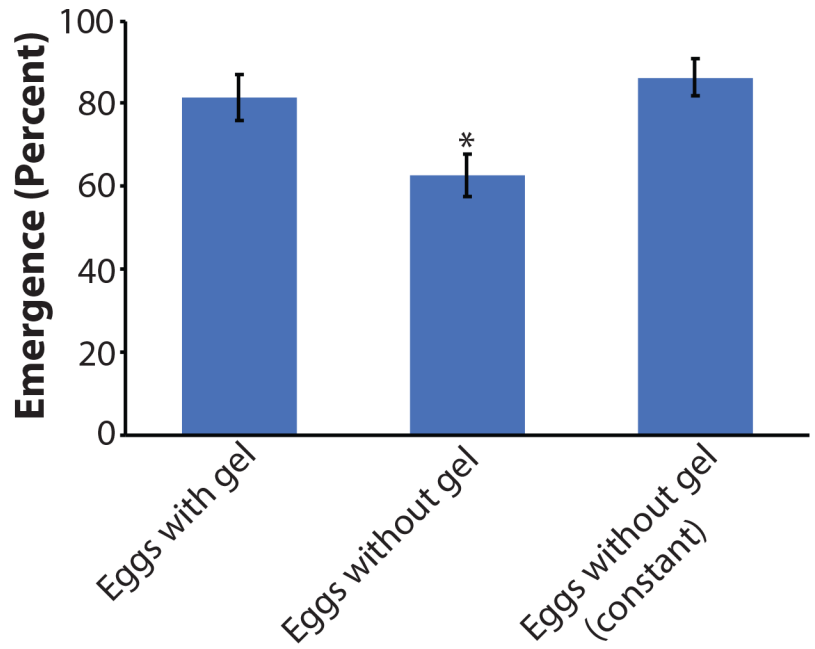

### C. Maximum temperate shift

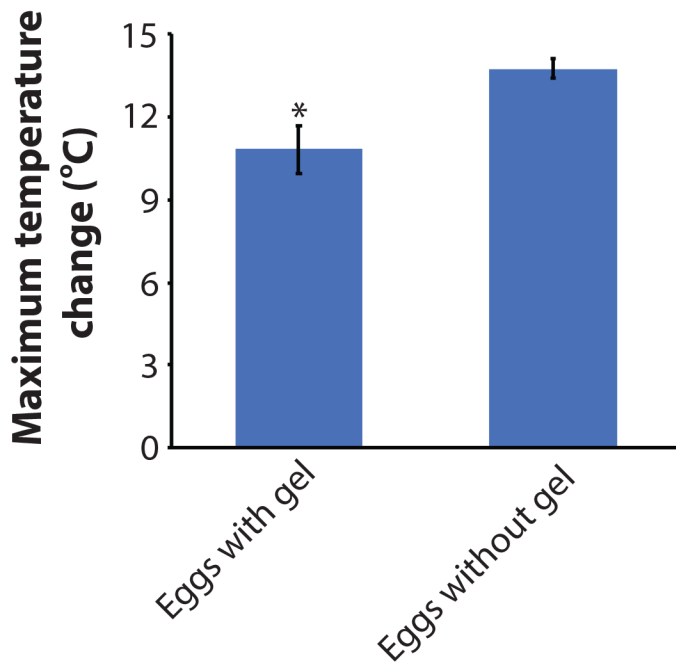

### D. Rate of temperate change

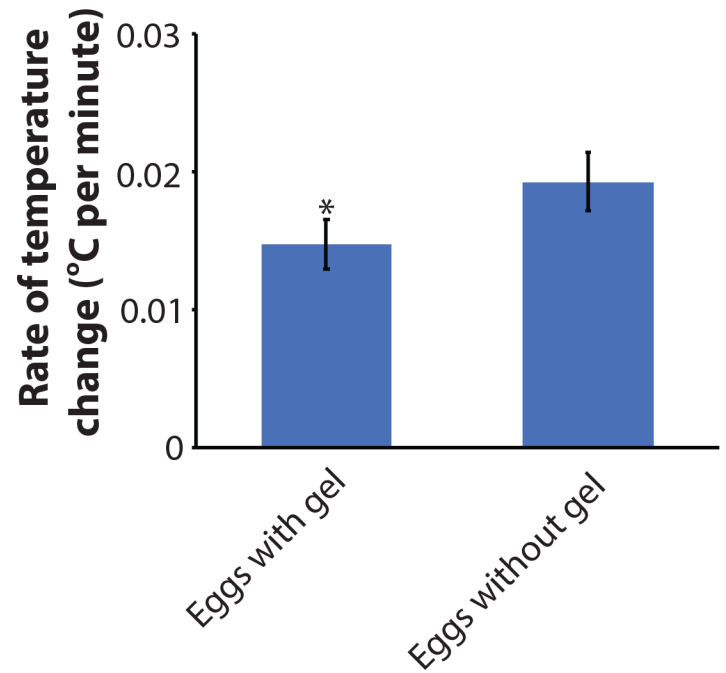



# Figure 1 &

bioRxiv preprint doi: <https://doi.org/10.1101/796797>; this version posted November 25, 2019. The copyright holder for this preprint (which was not certified by peer review) is the author/funder. All rights reserved. No reuse allowed without permission.

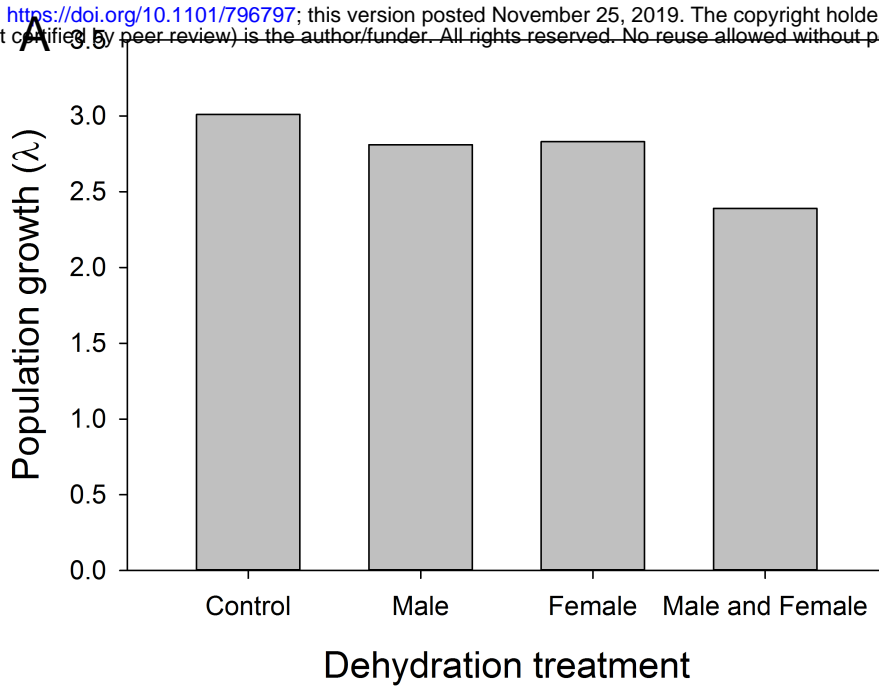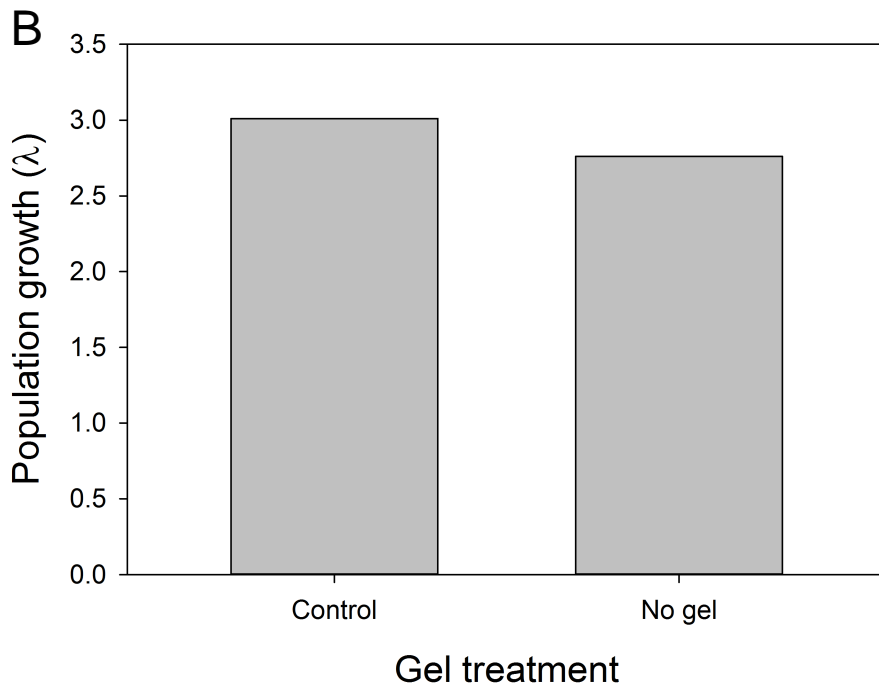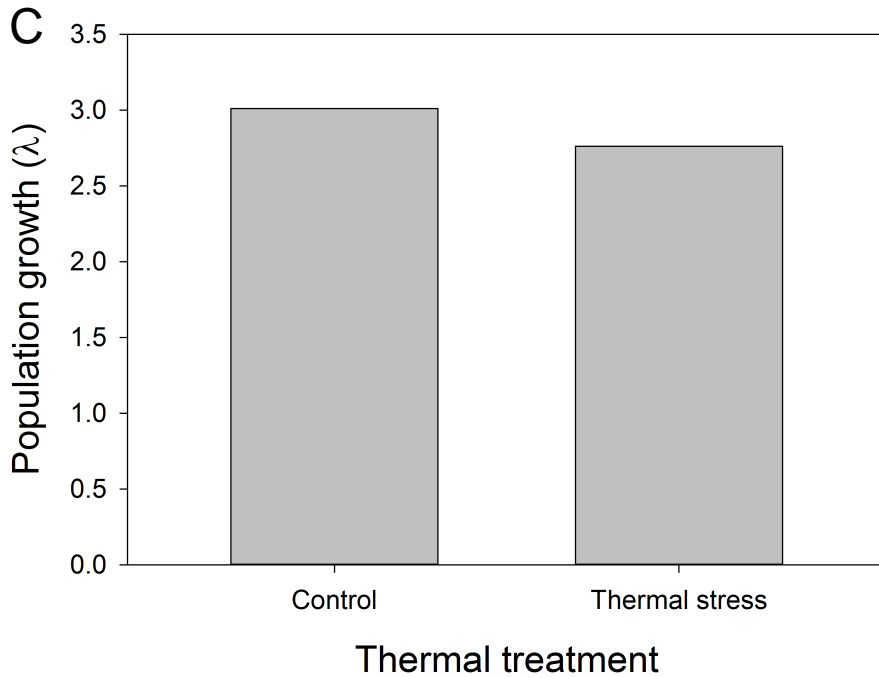

## Figure 15

### Mating, Fertilization and Seminal Fluid Transfer

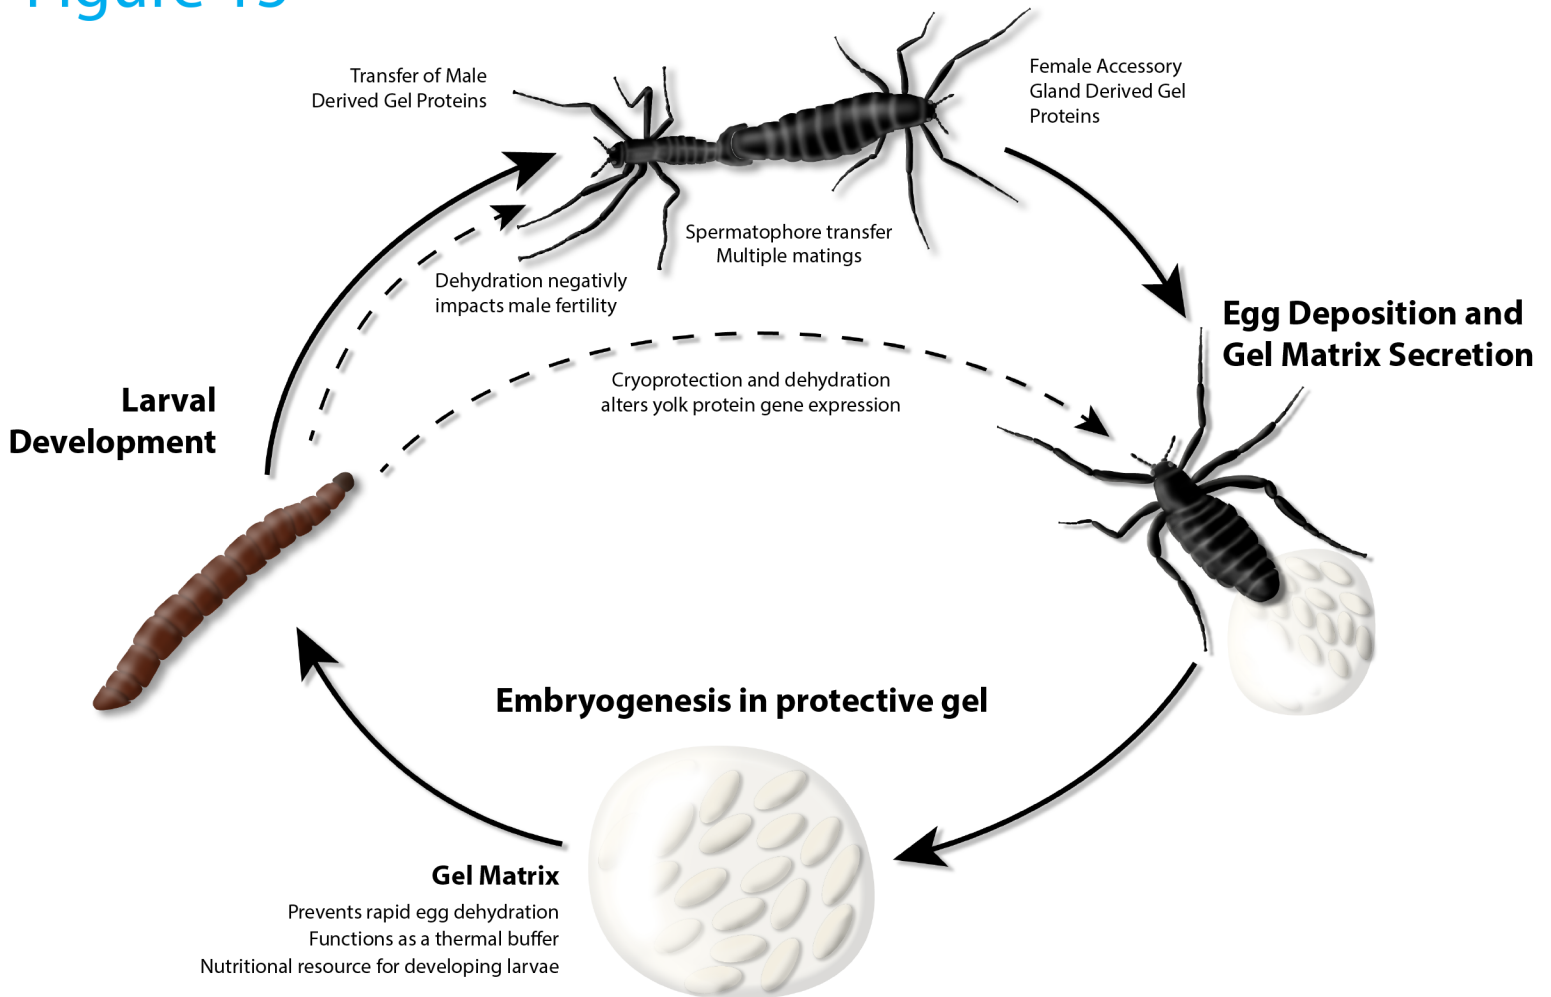

Source: https://www.biorxiv.org/content/10.1101/796797v2.full.pdf
